# Supplementary material for: New mononuclear Cu(i) compounds: synthesis, characterization, and application to the electroreduction of CO2
Source: Royal Society of Chemistry journal article supplement (doi:10.1039/d4cy00759j), 2024-01-01
Supplement: d4cy00759j1.pdf [file d4cy00759j1.pdf]

## SUPPLEMENTARY MATERIAL

### New Mononuclear Cu(I) Compounds Synthesis, Characterization, and Application to the Electroreduction of CO<sub>2</sub>.

Alma Arévalo, Enrique Juárez, Diego Roa, Marcos Flores-Alamo and Juventino J. García\*

#### Index

- Figure S1.** <sup>31</sup>P{<sup>1</sup>H}(THF-d<sub>8</sub>) NMR of Compound (2) [(dippe)Cu(PPh<sub>3</sub>)NO<sub>3</sub>].
- Figure S2.** <sup>13</sup>C{<sup>1</sup>H} (THF-d<sub>8</sub>) NMR of Compound (2) [(dippe)Cu(PPh<sub>3</sub>)NO<sub>3</sub>]. Full spectra.
- Figure S3.** <sup>13</sup>C{<sup>1</sup>H} (THF-d<sub>8</sub>) NMR of Compound (2) [(dippe)Cu(PPh<sub>3</sub>)NO<sub>3</sub>]. Aliphatic zone.
- Figure S4.** <sup>13</sup>C{<sup>1</sup>H} (THF-d<sub>8</sub>) NMR of Compound (2). Aromatic zone-
- Figure S5.** <sup>1</sup>H (THF-d<sub>8</sub>) NMR of Compound (2) [(dippe)Cu(PPh<sub>3</sub>)NO<sub>3</sub>].
- Figure S6.** <sup>1</sup>H (THF-d<sub>8</sub>) NMR of Compound (2) [(dippe)Cu(PPh<sub>3</sub>)NO<sub>3</sub>]. Aromatic Zone.
- Figure S7.** IR-ATR (neat) of Compound (2) [(dippe)Cu(PPh<sub>3</sub>)NO<sub>3</sub>].
- Figure S8.** Elemental Analysis for Compound (2) [(dippe)Cu(PPh<sub>3</sub>)NO<sub>3</sub>].
- Figure S9.** <sup>31</sup>P{<sup>1</sup>H} (THF-d<sub>8</sub>) NMR of Compound (3) [(depe)Cu(PPh<sub>3</sub>)NO<sub>3</sub>].
- Figure S10.** <sup>1</sup>H (THF-d<sub>8</sub>) NMR of Compound (3) [(depe)Cu(PPh<sub>3</sub>)NO<sub>3</sub>].
- Figure S11.** <sup>13</sup>C{<sup>1</sup>H} (THF-d<sub>8</sub>) NMR of Compound (3) [(depe)Cu(PPh<sub>3</sub>)NO<sub>3</sub>]. Full spectra.
- Figure S12.** <sup>13</sup>C{<sup>1</sup>H} (THF-d<sub>8</sub>) NMR of Compound (3) [(depe)Cu(PPh<sub>3</sub>)NO<sub>3</sub>]. Aliphatic zone.
- Figure S13.** <sup>13</sup>C{<sup>1</sup>H} (THF-d<sub>8</sub>) NMR of Compound (3) [(depe)Cu(PPh<sub>3</sub>)NO<sub>3</sub>]. Aromatic zone.
- Figure S14.** IR-ATR (neat) of Compound (3) [(depe)Cu(PPh<sub>3</sub>)NO<sub>3</sub>].
- Figure S15.** Elemental Analysis of Compound (3) [(depe)Cu(PPh<sub>3</sub>)NO<sub>3</sub>].

**Figure S16.**  $^{31}\text{P}\{^1\text{H}\}$  (THF- $d_8$ ) NMR of Compound (4) [(dppe)Cu(PPh<sub>3</sub>)NO<sub>3</sub>].

**Figure S17.**  $^1\text{H}$  NMR (THF- $d_8$ ) of Compound (4) [(dppe)Cu(PPh<sub>3</sub>)NO<sub>3</sub>].

**Figure S18.** IR-ATR (neat) of Compound (4) [(dppe)Cu(PPh<sub>3</sub>)NO<sub>3</sub>].

**Figure S19.** Elemental Analysis of Compound (4) [(dppe)Cu(PPh<sub>3</sub>)NO<sub>3</sub>].

**Figure S20.**  $^{31}\text{P}\{^1\text{H}\}$  (THF- $d_8$ ) NMR of Compound (5), [(dipf)CuNO<sub>3</sub>].

**Figure S21.**  $^1\text{H}$  (THF- $d_8$ ) NMR of Compound (5), [(dipf)CuNO<sub>3</sub>].

**Figure S22.**  $^{13}\text{C}\{^1\text{H}\}$  (THF- $d_8$ ) NMR of Compound (5) [(dipf)CuNO<sub>3</sub>].

**Figure S23.** IR-ATR (neat) of Compound (5), [(dipf)CuNO<sub>3</sub>].

**Figure S24.** Elemental Analysis for Compound (5) [(dipf)CuNO<sub>3</sub>].

**Table S1.** Crystal data and structure refinement for (2). [(dippe)Cu(PPh<sub>3</sub>)(NO<sub>3</sub>)]

**Table S2.** Bond lengths [Å] and angles [°] for (2) [(dippe)Cu(PPh<sub>3</sub>)(NO<sub>3</sub>)]

**Table S3.** Crystal data and structure refinement for (3) [(depe)Cu(PPh<sub>3</sub>)(NO<sub>3</sub>)]

**Table S4.** Bond lengths [Å] and angles [°] for (3) [(depe)Cu(PPh<sub>3</sub>)(NO<sub>3</sub>)]

**Table S5.** Crystal data and structure refinement for (5) [(dipf)Cu(NO<sub>3</sub>)]

**Table S6.** Bond lengths [Å] and angles [°] for (5) [(dipf)Cu(NO<sub>3</sub>)]

**Table S7.** Overpotential values ( $\eta$ ) for the Cu(I) compounds.

**Figure S25.** CV trace for dry acetonitrile.

**Figure S26.** CV trace for dry acetonitrile and CO<sub>2</sub>.

**Figure S27.** CV trace for ferrocene/ferrocinium pair.

**Figure S28.** Anodic peaks assignments corresponding to phosphine ligands in compound (2) [(dippe)Cu(PPh<sub>3</sub>)NO<sub>3</sub>].

**Figure S29.** Assignment of anodic peaks of the phosphine ligands for compound (3) [(depe)Cu(PPh<sub>3</sub>)NO<sub>3</sub>].

**Figure S30.** Assignment of anodic peaks of the phosphine ligands for compound (4) [(dppe)Cu(PPh<sub>3</sub>)NO<sub>3</sub>].

**Figure S31.** Assignment of anodic peaks of the phosphine ligands for compound (5) [(dipf)CuNO<sub>3</sub>].

**Figure S32.** Compound (2) behavior with different scanning speeds in Ar atmosphere.

**Figure S33.** Pseudo-first-order behavior of the cathodic process of Compound (2)

**Figure S34.** Compound (2) behavior with different scanning speeds in CO<sub>2</sub> atmosphere.

**Figure S35.** Pseudo-first-order behavior of the cathodic process of Compound (2) with CO<sub>2</sub>.

**Figure S36.** Compound (2) behavior with variable water equivalents under Ar atmosphere.

**Figure S37.** Compound (2) behavior with variable acetic acid equivalents under Ar and CO<sub>2</sub> atmosphere.

**Figure S38.** Compound (2) behavior with variable phenol equivalents and inhibition of the CO<sub>2</sub>RR process.

**Figure S39.** Compound (2) behavior with variable benzoic acid equivalents under Ar and CO<sub>2</sub> atmosphere.

**Figure S40.** Compound (2) behavior with variable PTSA equivalents under Ar and CO<sub>2</sub> atmosphere.

**Figure S41.** Compound (2) behavior with variable PTSA equivalents and inhibition of the CO<sub>2</sub>RR process.

**Figure S42.** Compound (1) under Ar and CO<sub>2</sub> atmosphere.

**Figure S43.** Compound (1) [Cu(PPh<sub>3</sub>)<sub>2</sub>NO<sub>3</sub>] behavior with variable phenol equivalents under Ar and CO<sub>2</sub> atmosphere.

**Figure S44.** Compound (1) behavior with variable benzoic acid equivalents under Ar and CO<sub>2</sub> atmosphere.

**Figure S45.** Compound (1) behavior with variable water equivalents under Ar and CO<sub>2</sub> atmosphere.

**Figure S46.** Compound (1) behavior with variable PTSA equivalents under Ar and CO<sub>2</sub> atmosphere.

**Figure S47.** Compound (1) behavior with variable PTSA equivalents and inhibition of the CO<sub>2</sub>RR process.

**Figure S48.** Compound (1) behavior with variable acetic acid equivalents under Ar and CO<sub>2</sub> atmosphere.

**Figure S49.** Compound (3) under Ar and CO<sub>2</sub> atmosphere.

**Figure S50.** Compound (3) behavior with variable acetic acid equivalents under Ar and CO<sub>2</sub> atmosphere.

**Figure S51.** Compound (3) behavior with variable PTSA equivalents under Ar and CO<sub>2</sub> atmosphere.

**Figure S52.** Compound (3) behavior with variable phenol equivalents under Ar and CO<sub>2</sub> atmosphere.

**Figure S53.** Compound (3) behavior with variable benzoic acid equivalents under Ar and CO<sub>2</sub> atmosphere.

**Figure S54.** Compound (3) behavior with variable water equivalents under Ar and CO<sub>2</sub> atmosphere.

**Figure S55.** Compound (4) under Ar and CO<sub>2</sub> atmosphere.

**Figure S56.** Compound (4) behavior with variable PTSA equivalents under Ar and CO<sub>2</sub> atmosphere.

**Figure S57.** Compound (4) behavior with variable phenol equivalents under Ar and CO<sub>2</sub> atmosphere.

**Figure S58.** Compound (4) behavior with variable benzoic acid equivalents under Ar and CO<sub>2</sub> atmosphere.

**Figure S59.** Compound (4) behavior with variable water equivalents under Ar and CO<sub>2</sub> atmosphere.

**Figure S60.** Compound (4) behavior with variable acetic acid equivalents under Ar and CO<sub>2</sub> atmosphere.

**Figure S61.** Compound (5) under Ar and CO<sub>2</sub> atmosphere.

**Figure S62.** Compound (5) behavior with variable PTSA equivalents under Ar and CO<sub>2</sub> atmosphere.

**Figure S63.** Compound (5) behavior with variable phenol equivalents under Ar and CO<sub>2</sub> atmosphere.

**Figure S64.** Compound (5) behavior with variable benzoic acid equivalents under Ar and CO<sub>2</sub> atmosphere.

**Figure S65.** Compound (5) behavior with variable water equivalents under Ar and CO<sub>2</sub> atmosphere.

**Figure S66.** Compound (5) behavior with variable acetic acid equivalents under Ar and CO<sub>2</sub> atmosphere.

**Figure S67.** Elemental analysis of [Rh(PPh<sub>3</sub>)<sub>3</sub>Cl(NO)].

**Figure S68.** MS spectra of hydrolyzed product (d).

### *Spectroscopic Data for the Obtained Compounds*

Compound (2), [(dippe)Cu(PPh<sub>3</sub>)NO<sub>3</sub>].

Compound (2). NMR (600 MHz): <sup>31</sup>P{<sup>1</sup>H} (THF-d<sub>8</sub>), δ=0.45 ppm (br. s., PPh<sub>3</sub>), δ=12.14 ppm (br. s., dippe). <sup>13</sup>C{<sup>1</sup>H} δ= 20.21 ppm (s, -CH<sub>3</sub>), δ= 20.53 ppm (s, -CH<sub>2</sub>- bridge), δ= 25.18 ppm (s, -CH-*i*Pr), δ= 129.7 ppm (d, *m*-PPh<sub>3</sub>, <sup>3</sup>J<sub>C-P</sub>= 7.5 Hz), δ= 130.6 ppm (s, *p*-PPh<sub>3</sub>), δ= 135.5 ppm (d, *o*-C-PPh<sub>3</sub>, <sup>2</sup>J<sub>C-P</sub>= 15.09 Hz), δ= 137.81 ppm (s, <sup>i</sup>C-PPh<sub>3</sub>).

$^1\text{H}$ ,  $\delta=1.20$  ppm (s,  $-\text{CH}_3$ ),  $\delta=1.91$  ppm (s,  $-\text{CH}_2-$  bridge),  $\delta=2.15$  ppm (s,  $-\text{CH}$ -isopropyl),  $\delta=7.37$  ppm (m,  $\text{H}_o$  y  $\text{H}_m$   $-\text{PPh}_3$ ),  $\delta=7.54$  ppm (t,  $\text{H}_p$   $-\text{PPh}_3$ ). IR (ATR-neat):  $3055\text{ cm}^{-1}$ ,  $2954\text{ cm}^{-1}$ ,  $2868\text{ cm}^{-1}$  (w,  $\text{C}=\text{C}$   $-\text{PPh}_3$  ring),  $1399\text{ cm}^{-1}$  (s,  $\text{N}-\text{O}$  sym),  $1299\text{ cm}^{-1}$  (s,  $\text{N}-\text{O}$  asym.),  $700\text{ cm}^{-1}$  (s,  $-\text{PPh}_3$  ring). Anal. Calcd. for :  $\text{C}_{32}\text{H}_{47}\text{O}_3\text{NP}_3\text{Cu}$ : %C, 59.11, %H, 7.3, %N, 2.15. Found: %C, 56.9, %H, 7.5, %N: 2.3. Melting point:  $202\text{ }^\circ\text{C}$  (d).

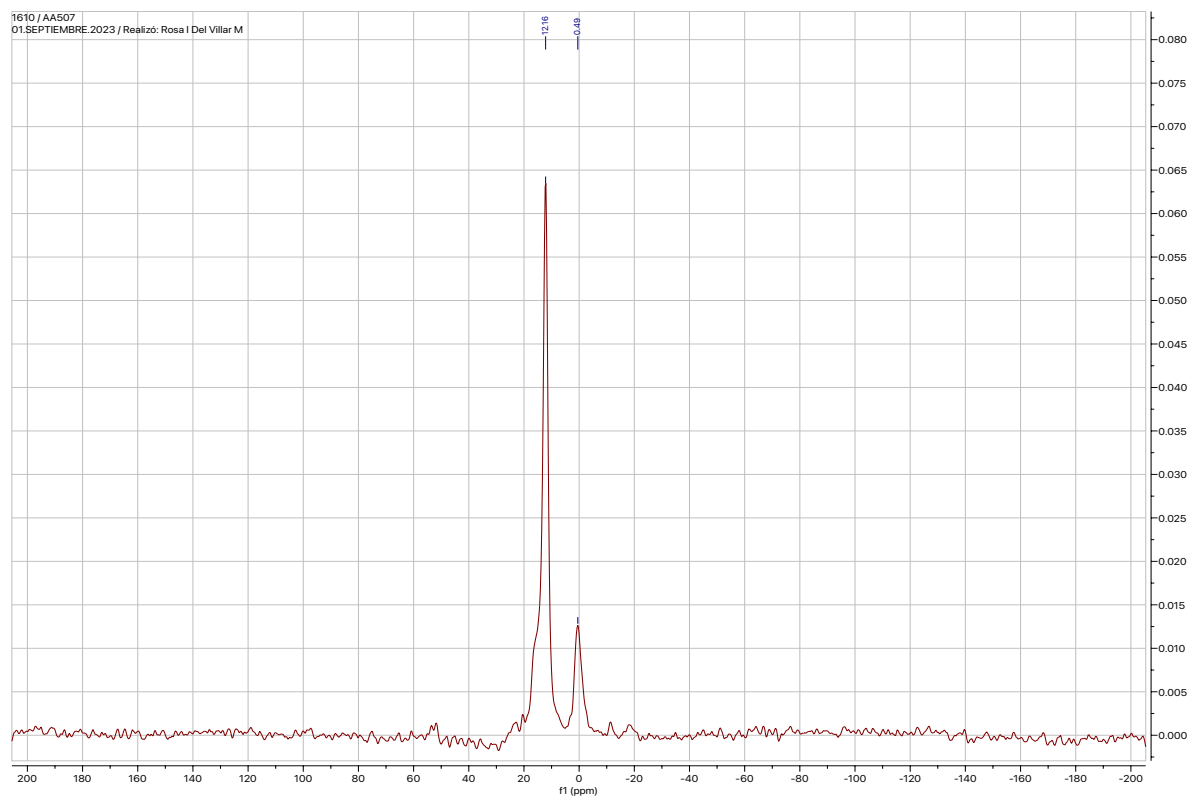

Figure S1.  $^{31}\text{P}\{^1\text{H}\}$  (THF- $d_8$ ) NMR of Compound (2),

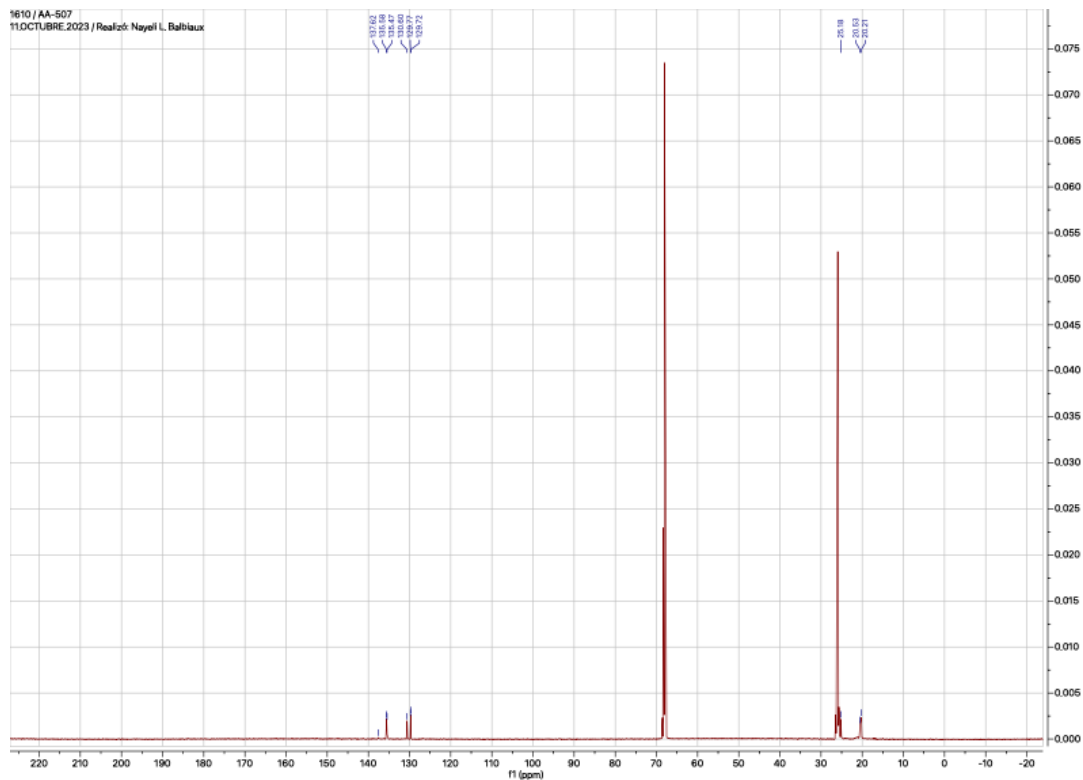

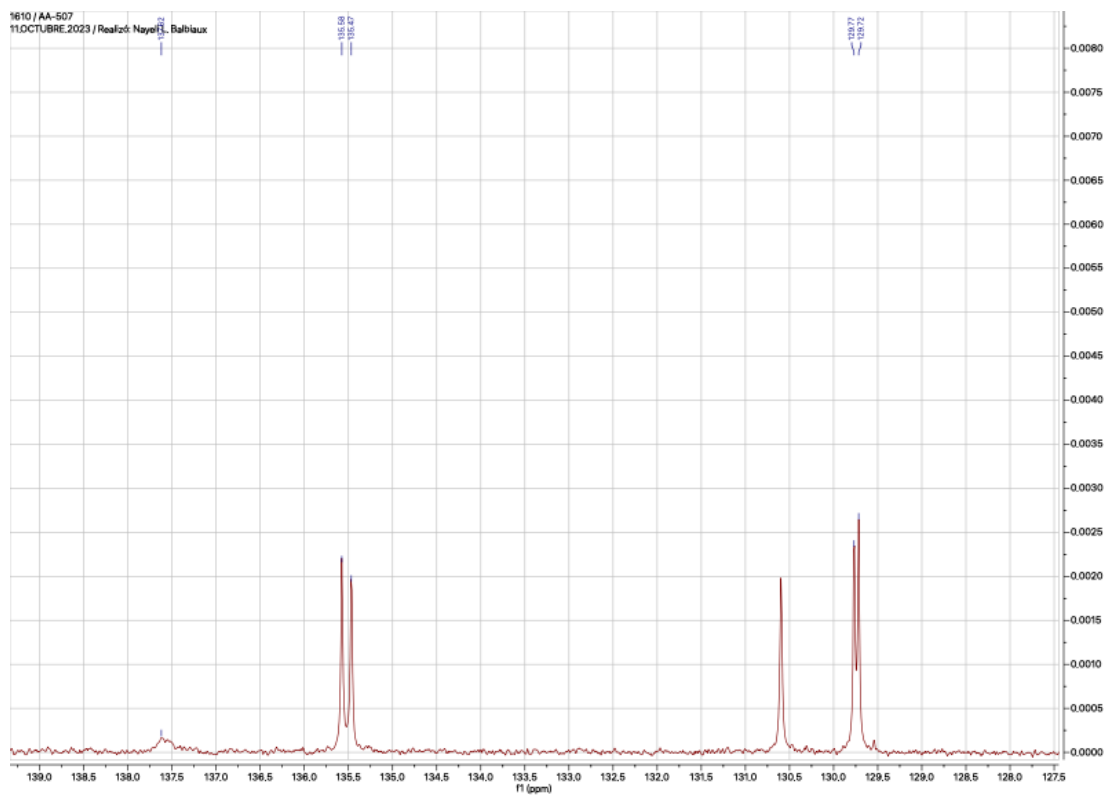

Figure S4.  $^{13}\text{C}\{^1\text{H}\}$  (THF- $d_8$ ) NMR of Compound (**2**). Aromatic zone-

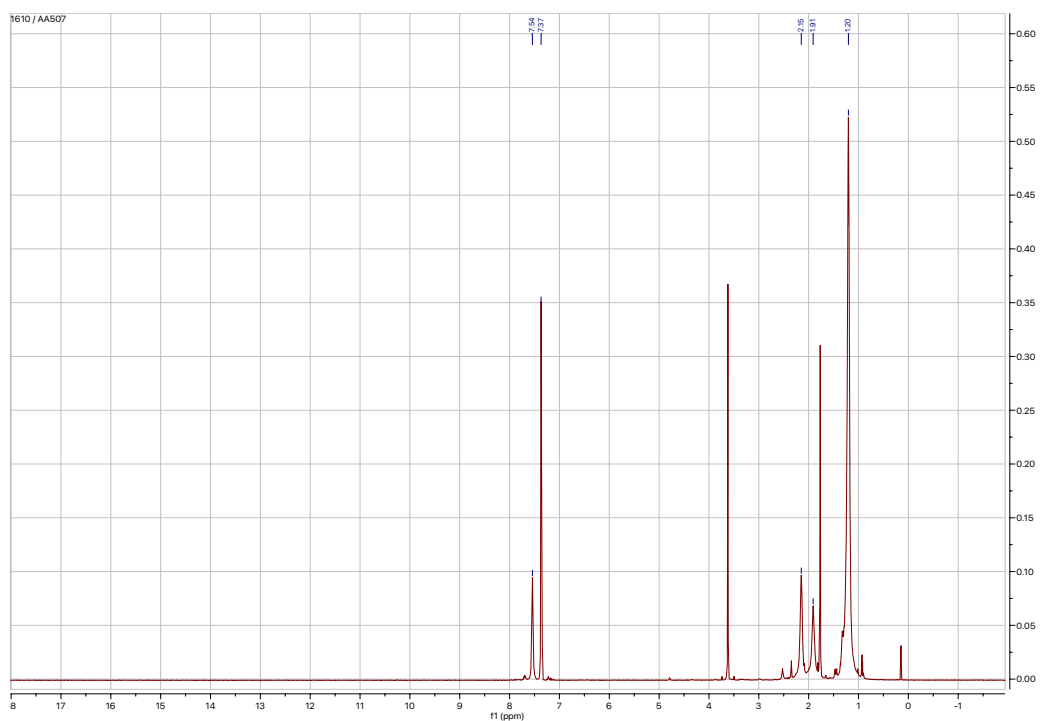

Figure S5.  $^1\text{H}$  NMR (THF- $d_8$ ) NMR of Compound (**2**)

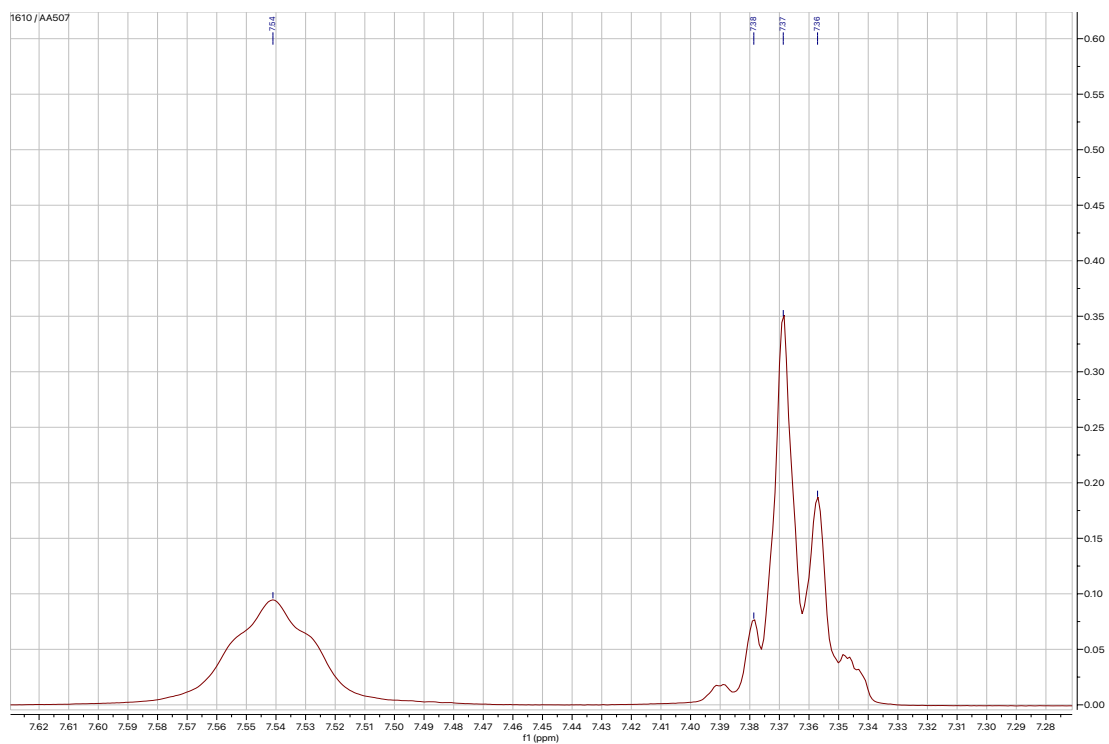

Figure S6. <sup>1</sup>H NMR (THF-d<sub>8</sub>) NMR of Compound (2) Aromatic Zone.

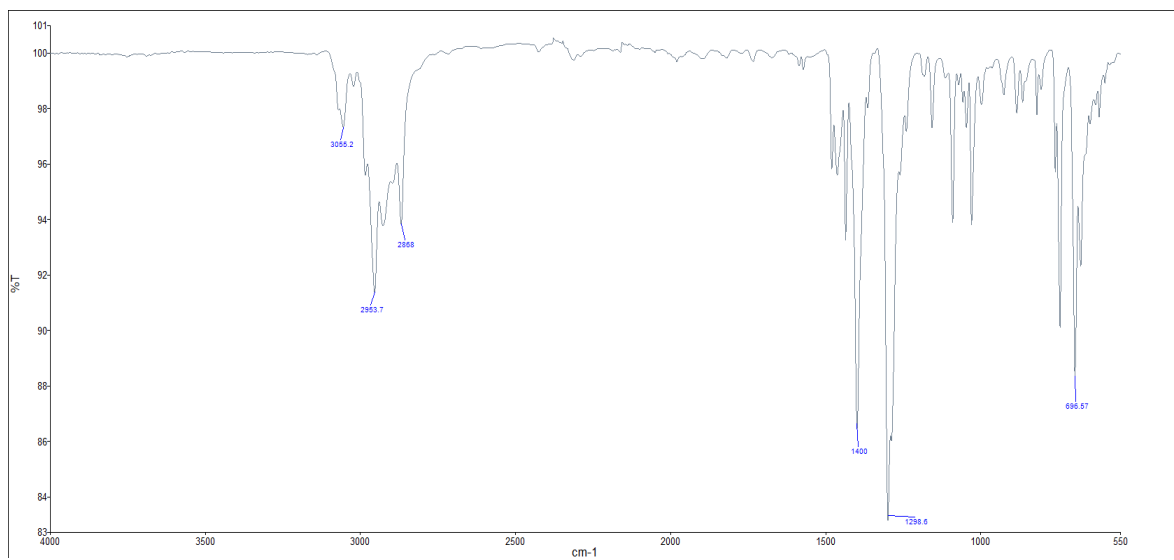

Figure S7. IR-ATR (neat) of Compound (2) [(dippe)Cu(PPh<sub>3</sub>)NO<sub>3</sub>].



|                       |                                         |
|-----------------------|-----------------------------------------|
| <b>Date of report</b> | 25-Oct-22 6:13:44PM                     |
| <b>User ID</b>        | Realizo: M en I. Victor Hugo Lemus Neri |
| <b>Comments</b>       | Muestra: AA507                          |

| Run         | Weight             | Carbon | Hydrogen | Nitrogen | Created on           |
|-------------|--------------------|--------|----------|----------|----------------------|
| 1414826104A | 1.128              | 55.68% | 7.49%    | 2.32%    | 25-Oct-22 3:05:18 PM |
| 1414826104B | 1.56               | 58.16% | 7.55%    | 2.4%     | 25-Oct-22 3:10:10 PM |
|             | Average            | 56.920 | 7.520    | 2.360    |                      |
|             | Variance           | 3.075  | 0.002    | 0.003    |                      |
|             | Standard Deviation | 0.305  | 1.754    | 0.042    | 0.057                |

## Figure S8. Elemental Analysis for Compound (2)

### Compound (3). [(depe)Cu(PPh<sub>3</sub>)NO<sub>3</sub>]

Compound (3). NMR (600MHz): <sup>31</sup>P{<sup>1</sup>H} (THF-d<sub>8</sub>): δ=-6.47 (d, P-bridge), δ= 2.78 ppm (m, -PPh<sub>3</sub>). <sup>1</sup>H: δ= 0.95 ppm (m, -CH<sub>3</sub>), δ= 1.60 ppm (s, -CH<sub>2</sub>), δ=2.52 ppm (m, -CH<sub>2</sub> bridge), δ= 7.3 ppm (2H, -PPh<sub>3</sub>), δ= 7.37 ppm (2H, -PPh<sub>3</sub>), δ= 7.51 ppm (H, PPh<sub>3</sub>). IR (ATR-neat): 3053-2875 cm<sup>-1</sup>(-CH<sub>3</sub> and -CH<sub>2</sub>-, str.), 1434 cm<sup>-1</sup>(N-O asym), 1337 cm<sup>-1</sup> (C-H felx.), 1090-1028 cm<sup>-1</sup> (C-H arom.), 694 cm<sup>-1</sup> (C-H arom.). Anal. Calcd. for C<sub>28</sub>H<sub>39</sub>O<sub>3</sub>NP<sub>3</sub>Cu: %C, 56.7, %H, 6.62, %N, 2.3. Found: %C, 62, %H, 6.6, %N, 2.02. Melting point: 257 °C (d).

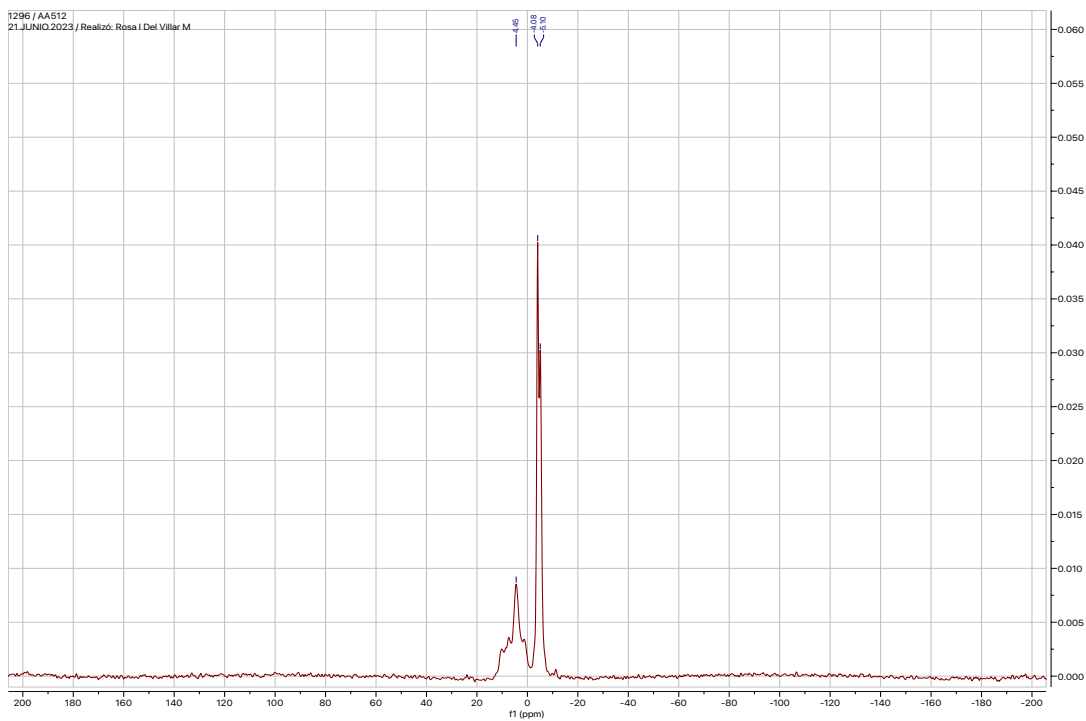

Figure S9.  $^{31}\text{P}\{^1\text{H}\}$  (THF- $d_8$ ) NMR of Compound **(3)** [(depe)Cu(PPh $_3$ )NO $_3$ ].

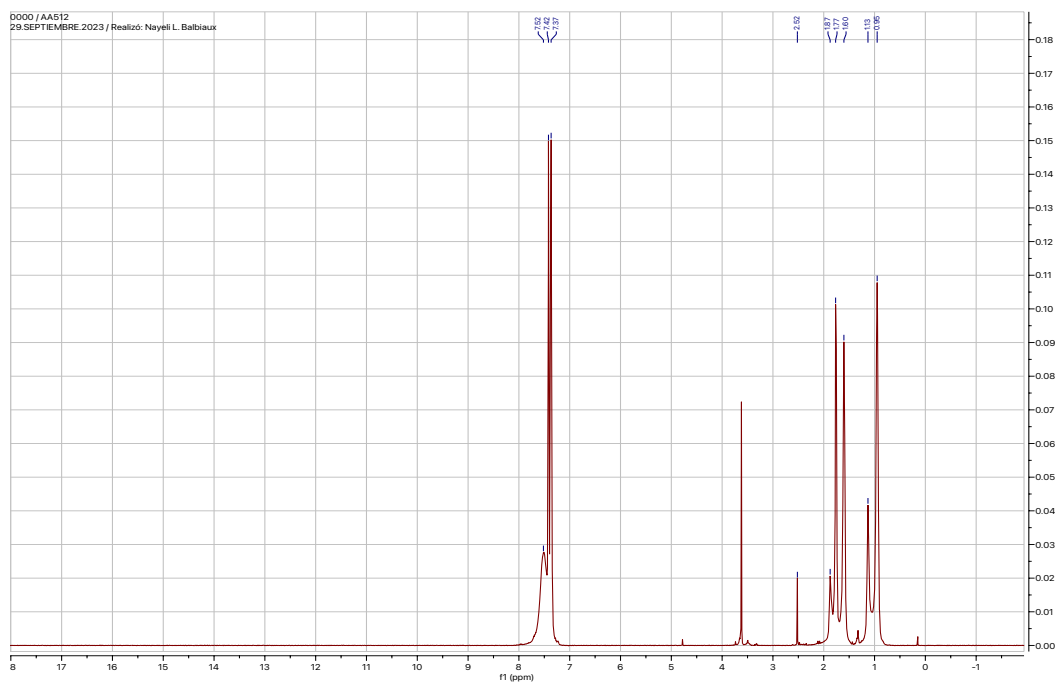

Figure S10.  $^1\text{H}$  (THF- $d_8$ ) NMR of Compound **(3)** [(depe)Cu(PPh $_3$ )NO $_3$ ].

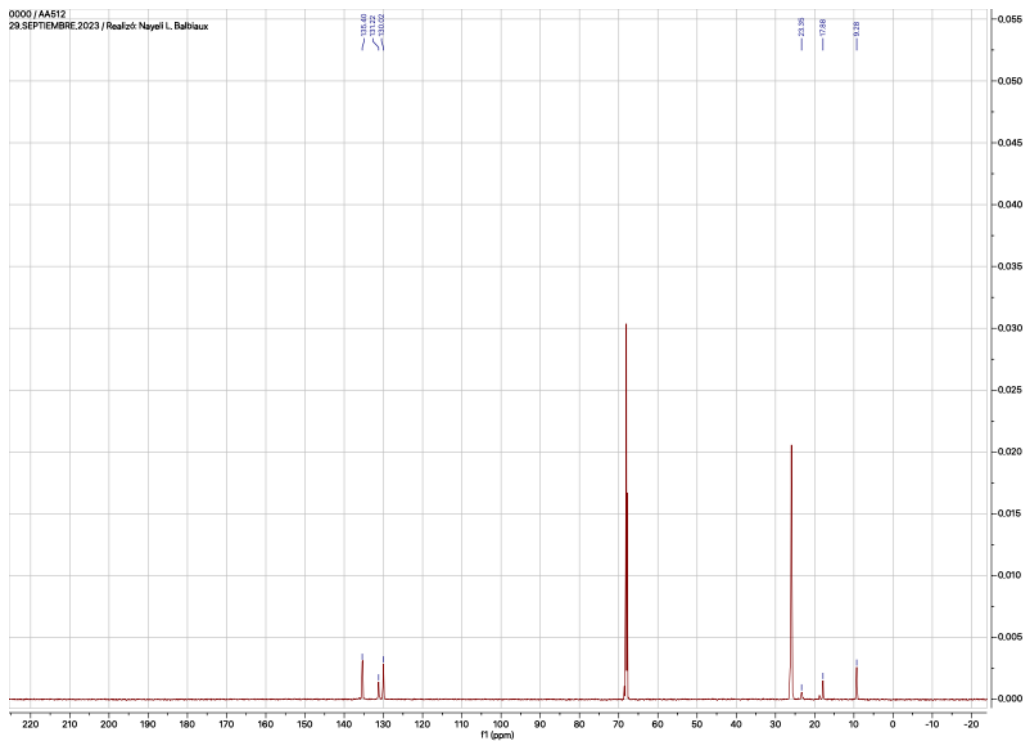

Figure S11.  $^{13}\text{C} \{^1\text{H}\}$  (THF- $d_8$ ) NMR of Compound (**3**). Full spectra.

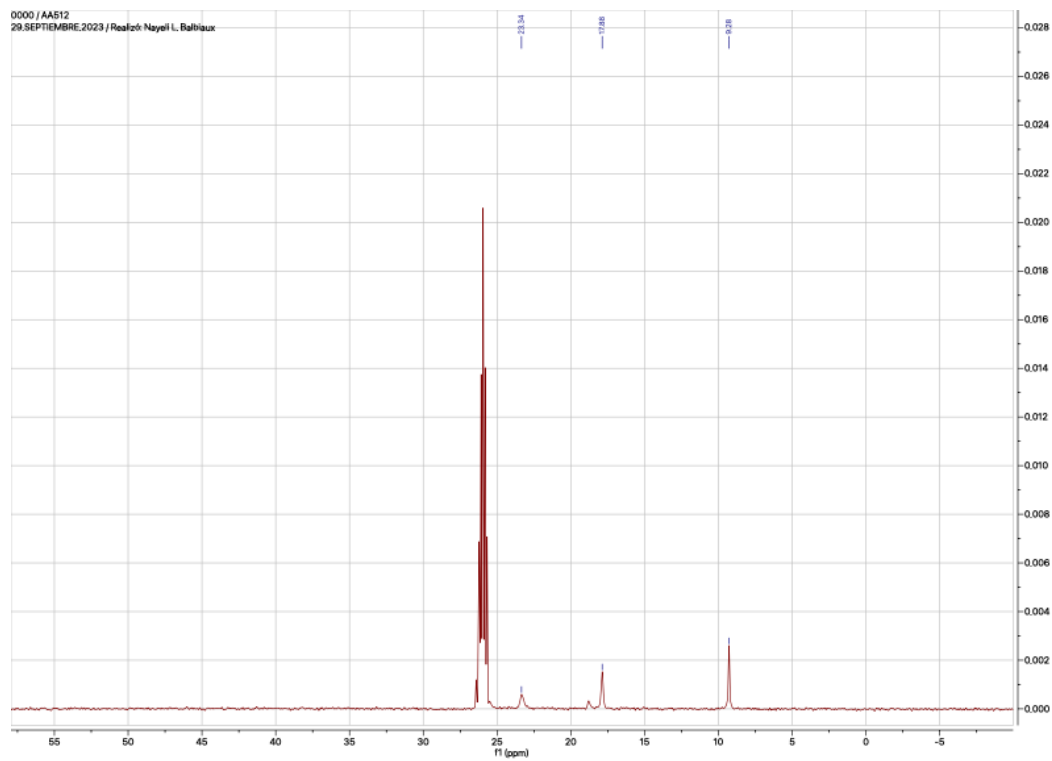

Figure S12.  $^{13}\text{C} \{^1\text{H}\}$  (THF- $d_8$ ) NMR of Compound (**3**) Alifatic zone.

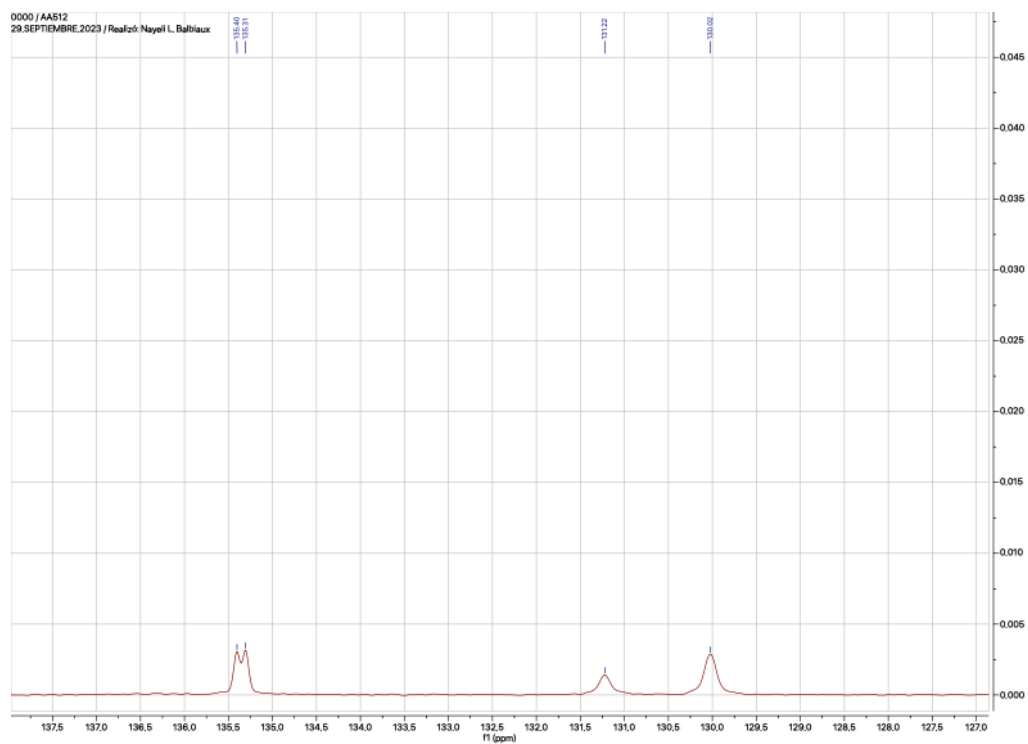

Figure S13.  $^{13}\text{C} \{^1\text{H}\}$  (THF- $d_8$ ) NMR of Compound (**3**) Aromatic zone.

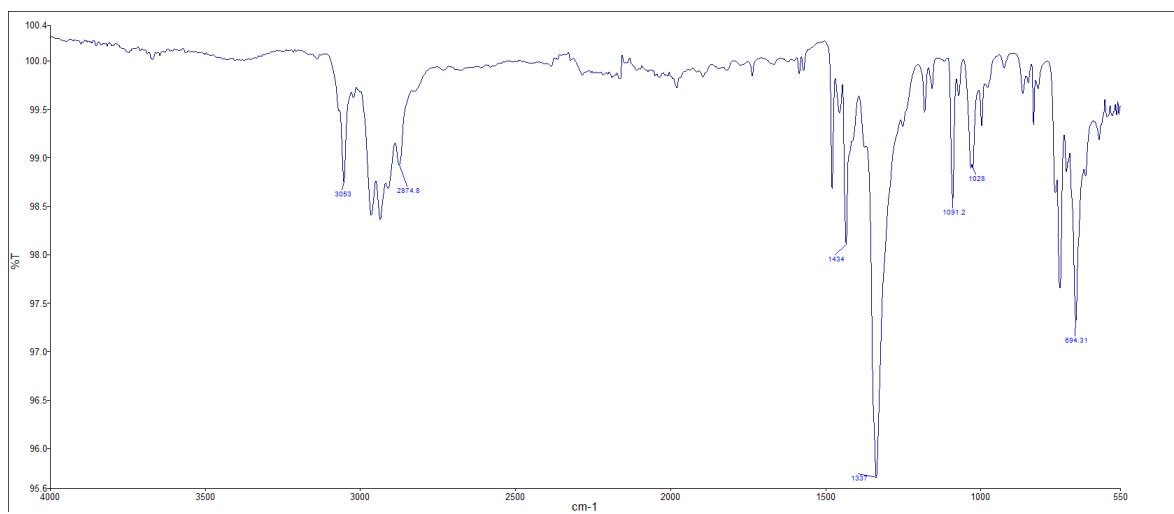

Figure S14. IR-ATR (neat) of Compound (**3**) [(depe)Cu(PPh<sub>3</sub>)NO<sub>3</sub>].

|                       |                                         |        |          |          |                      |
|-----------------------|-----------------------------------------|--------|----------|----------|----------------------|
| <b>Date of report</b> | 21-Jun-23 12:33:30PM                    |        |          |          |                      |
| <b>User ID</b>        | Realizo: M en I, Victor Hugo Lemus Neri |        |          |          |                      |
| <b>Comments</b>       | Muestra: AAS12                          |        |          |          |                      |
| Run                   | Weight                                  | Carbon | Hydrogen | Nitrogen | Created on           |
| 1789770720B           | 2.28                                    | 62.51% | 6.75%    | 2.02%    | 20-Jun-23 2:44:47 PM |
| 1789770720A           | 2.187                                   | 62.19% | 6.61%    | 2.02%    | 20-Jun-23 2:39:40 PM |
|                       | Weight                                  | Carbon | Hydrogen | Nitrogen |                      |
| Average               | 2.234                                   | 62.350 | 6.680    | 2.020    |                      |
| Variance              | 0.004                                   | 0.051  | 0.010    | 0.000    |                      |
| Standard Deviation    | 0.066                                   | 0.226  | 0.099    | 0.000    |                      |

### Figure S15. Elemental Analysis of Compound (3)

Compound (4). [(dppe)Cu( PPh<sub>3</sub>)NO<sub>3</sub>].

Compound (4). NMR (600MHz): <sup>31</sup>P{<sup>1</sup>H} (THF-d<sub>8</sub>): δ=-6.22 ppm (s, P-bridge), δ=2.91 ppm (m, -PPh<sub>3</sub>). <sup>1</sup>H: δ= 2.42 ppm (m, -CH bridge), δ= 7.3 ppm (m, aromatic phosphines). IR (ATR-neat): 3052 cm<sup>-1</sup> (C-H str. Arom.), 1434 cm<sup>-1</sup> (N-O asym), 1274 cm<sup>-1</sup> (N-O sym), 1096-1022 cm<sup>-1</sup> (C-H arom.), 692 cm<sup>-1</sup> (C-H arom.). Anal. Calcd. for C<sub>44</sub>H<sub>43</sub>O<sub>3</sub>NP<sub>3</sub>Cu: %C, 66.8, %H, 5.4, %N, 1.8. Found: %C, 66.8, %H, 5.1, %N, 2.6. Melting point: 256 °C (d).

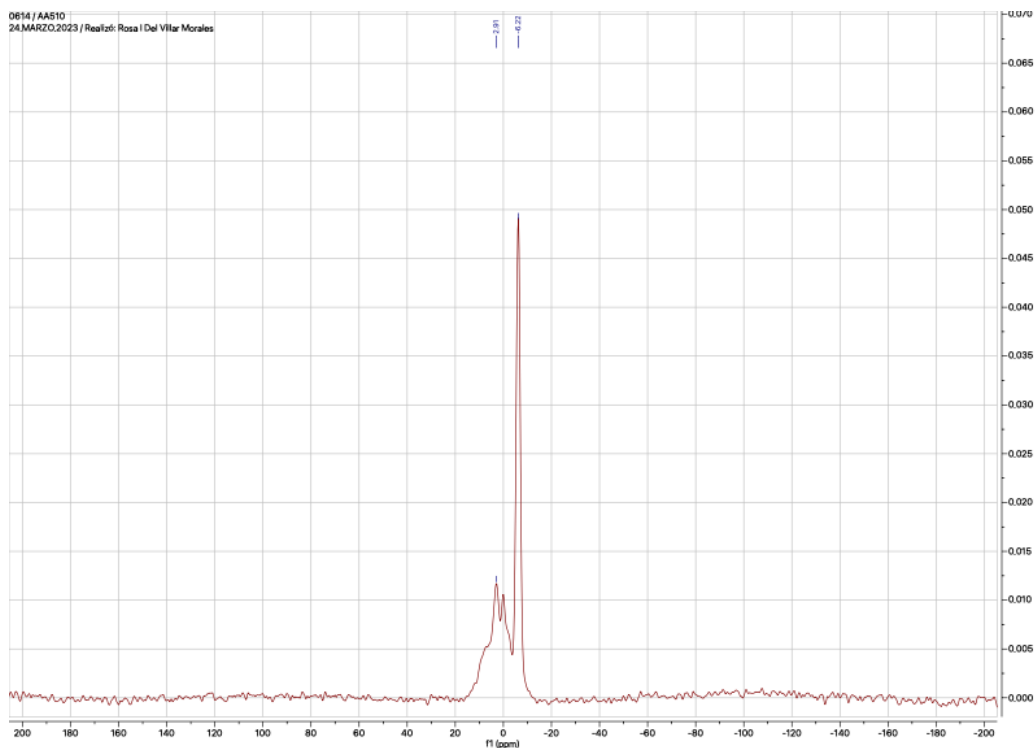

Figure S16  $^{31}\text{P}\{^1\text{H}\}$  (THF- $\text{d}_8$ ): NMR of Compound (4)

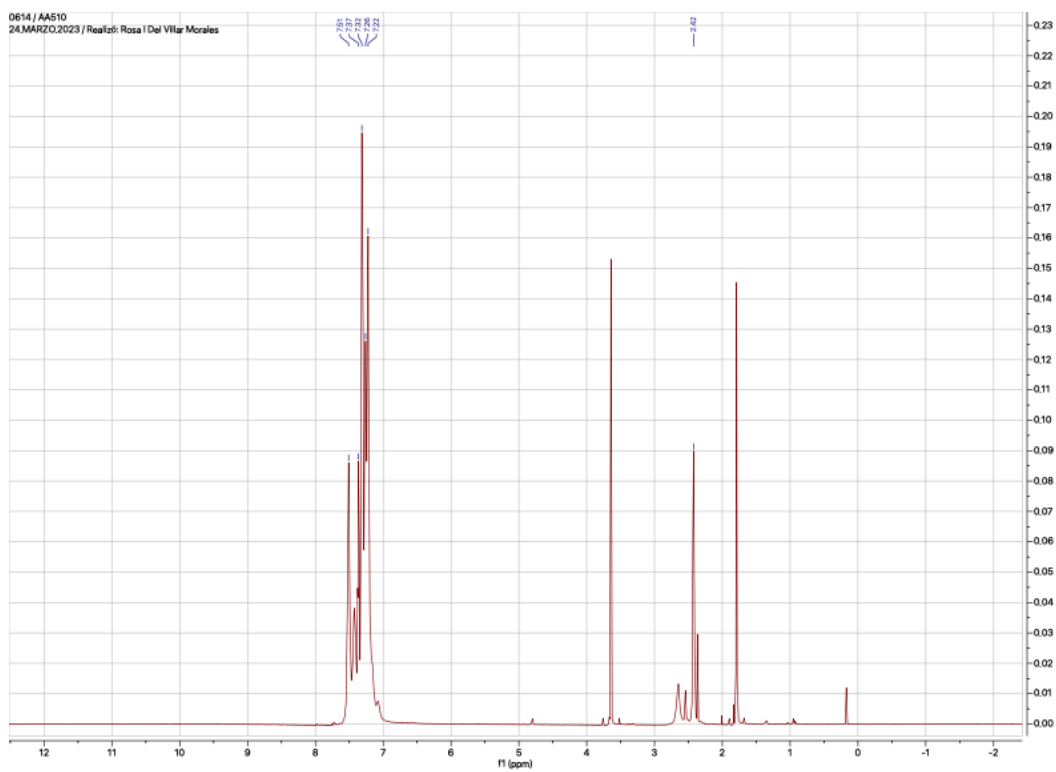

Figure S17.  $^1\text{H}$  (THF- $\text{d}_8$ ): NMR of Compound (4)

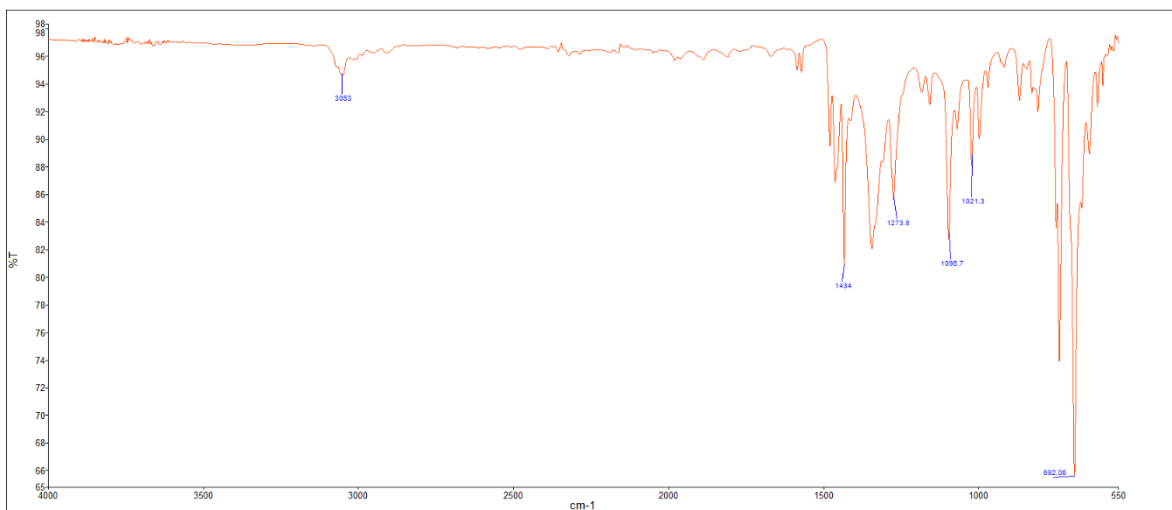

Figure S18. IR-ATR (neat) of Compound (4)

Unidad de Servicios de Apoyo a la Investigación y a la Industria (USAII)  
 Facultad de Química, UNAM, Edificio H "Mario Molina"  
 Email: vicemus@unam.mx  
 Phone: 56.22.38.99 Ext. 84040

|                       |                                         |
|-----------------------|-----------------------------------------|
| <b>Date of report</b> | 22-May-23 7:04:52PM                     |
| <b>User ID</b>        | Realizo: M en I. Victor Hugo Lemus Neri |
| <b>Comments</b>       | Muestra: AA510                          |

| Run         | Weight             | Carbon | Hydrogen | Nitrogen | Created on           |
|-------------|--------------------|--------|----------|----------|----------------------|
| 7734833569B | 1.227              | 66.79% | 5.14%    | 2.72%    | 22-May-23 4:39:04 PM |
| 7734833569A | 1.499              | 66.85% | 5.1%     | 2.59%    | 22-May-23 4:34:00 PM |
|             | Weight             | Carbon | Hydrogen | Nitrogen |                      |
|             | Average            | 66.820 | 5.120    | 2.655    |                      |
|             | Variance           | 0.002  | 0.001    | 0.008    |                      |
|             | Standard Deviation | 0.0192 | 0.042    | 0.028    |                      |

Figure S19. Elemental Analysis of Compound (4).

Compound (5) [(dipf)CuNO<sub>3</sub>].

Compound (5). NMR (600 MHz): <sup>31</sup>P{<sup>1</sup>H} (THF-d<sub>8</sub>), δ= 3.13 ppm (s). <sup>1</sup>H, δ= 1.30 ppm (m, -CH<sub>3</sub>), δ= 2.29 ppm (m, -CH-), δ= 4.44 (s, -CH, Fc), δ= 4.53 ppm (s, -CH, Fc). <sup>13</sup>C{<sup>1</sup>H}, δ= 20.59 ppm (m, -CH<sub>3</sub>), δ= 21.44 ppm (-CH-), δ= 72.48 ppm (-CH-, Fc), δ= 75.19 ppm (-CH-, Fc). IR (ATR-neat): 2958-2866 cm<sup>-1</sup> (-C-H alkyl), 1431 cm<sup>-1</sup> (N-O asym), 1286 cm<sup>-1</sup> (N-O sym), 1024 cm<sup>-1</sup>(Fc), 820 cm<sup>-1</sup> (Fc). Anal. Calcd. for C<sub>22</sub>H<sub>36</sub>O<sub>3</sub>NP<sub>2</sub>FeCu: %C,48.59, %H, 6.67, %N, 2.58. Found: %C, 50.22, %H, 6.81, %N, 3.11 Melting Point: 183 °C (d).

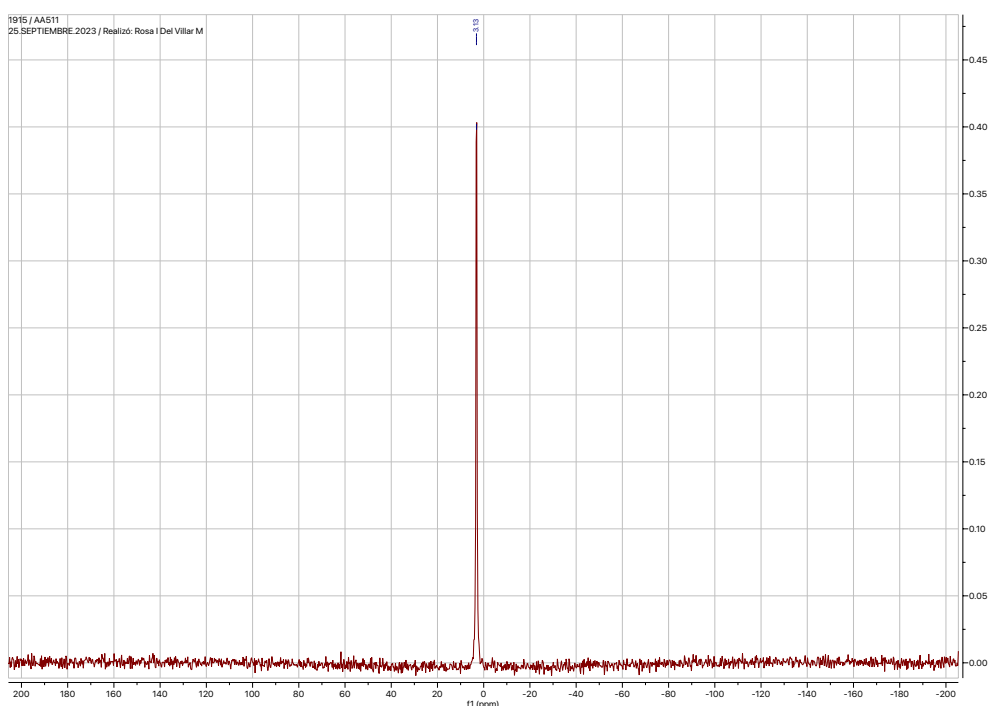

Figure S20. <sup>31</sup>P{<sup>1</sup>H} (THF-d<sub>8</sub>) NMR of Compound (5).



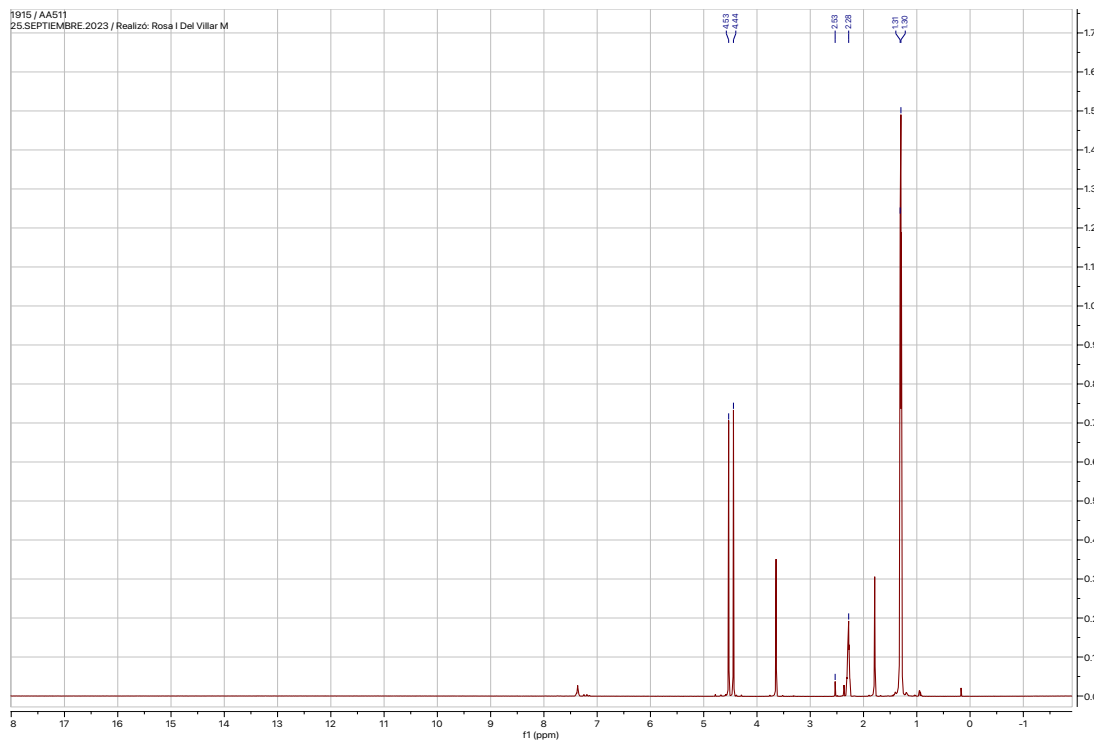

Figure S21.  $^1\text{H}$  (THF- $d_8$ ) NMR of Compound (**5**),

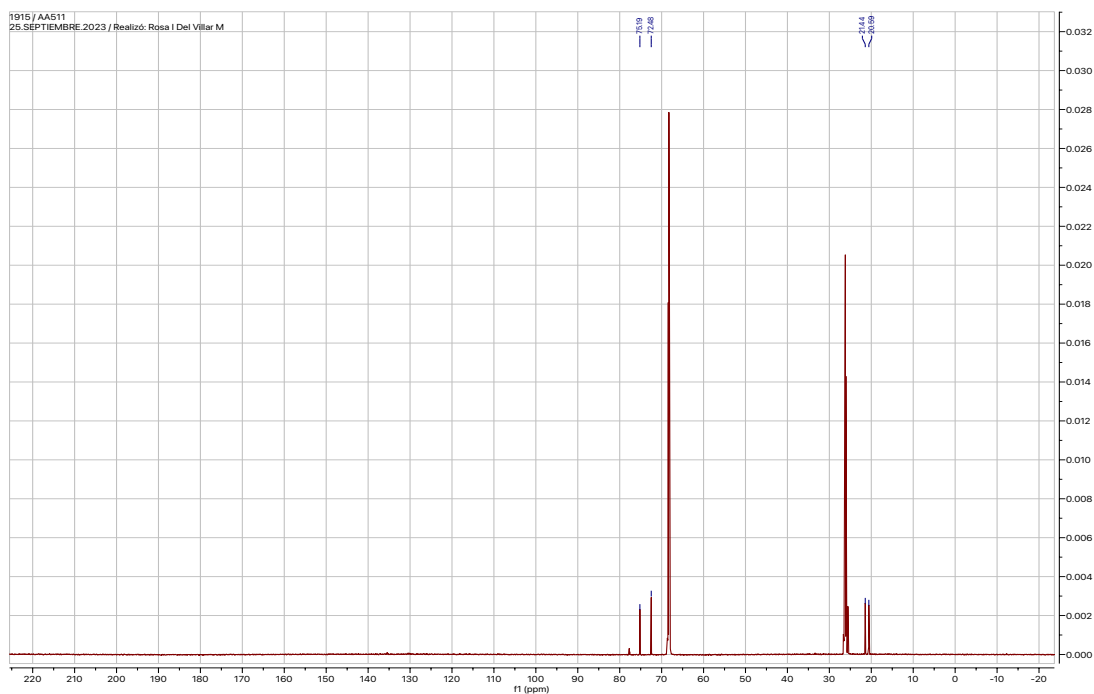

Figure S22.  $^{13}\text{C}\{^1\text{H}\}$  (THF- $d_8$ ) NMR of Compound (**5**).

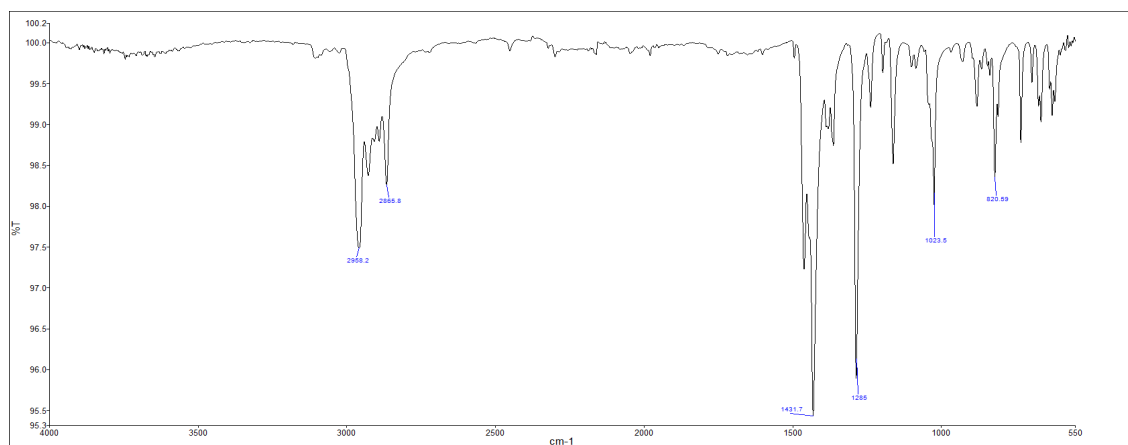

Figure S23. IR-ATR (neat) of Compound (5).

Unidad de Servicios de Apoyo a la Investigación y a la Industria (USAII)  
 Facultad de Química, UNAM, Edificio H "Mario Molina"  
 Email: viclemus@unam.mx  
 Phone: 56.22.38.99 Ext. 84040

|                       |                                         |
|-----------------------|-----------------------------------------|
| <b>Date of report</b> | 22-May-23 7:38:32PM                     |
| <b>User ID</b>        | Realizo: M en I. Victor Hugo Lemus Neri |
| <b>Comments</b>       | Muestra: AA511                          |

22-May-23

| Run         | Weight (mg) | Carbon | Hydrogen | Nitrogen |
|-------------|-------------|--------|----------|----------|
| 2846988985A | 1.439       | 50.22% | 6.81%    | 3.11%    |

Figure S24 Elemental Analysis for Compound (5).

## XRD data for Cu(I) compounds

**Table S1.** Crystal data and structure refinement for (2) [(dippe)Cu(PPh<sub>3</sub>)(NO<sub>3</sub>)]

| Identification code               | <b>2</b>                                                           |                                          |
|-----------------------------------|--------------------------------------------------------------------|------------------------------------------|
| Empirical formula                 | C <sub>32</sub> H <sub>47</sub> Cu N O <sub>3</sub> P <sub>3</sub> |                                          |
| Formula weight                    | 650.15                                                             |                                          |
| Temperature                       | 130(2) K                                                           |                                          |
| Wavelength                        | 0.71073 Å                                                          |                                          |
| Crystal system                    | Monoclinic                                                         |                                          |
| Space group                       | P 21/n                                                             |                                          |
| Unit cell dimensions              | a = 12.7674(5) Å<br>b = 17.7058(7) Å<br>c = 15.0682(6) Å           | α = 90°.<br>β = 105.218(4)°.<br>γ = 90°. |
| Volume                            | 3286.8(2) Å <sup>3</sup>                                           |                                          |
| Z                                 | 4                                                                  |                                          |
| Density (calculated)              | 1.314 Mg/m <sup>3</sup>                                            |                                          |
| Absorption coefficient            | 0.843 mm <sup>-1</sup>                                             |                                          |
| F(000)                            | 1376                                                               |                                          |
| Crystal size                      | 0.400 x 0.370 x 0.270 mm <sup>3</sup>                              |                                          |
| Theta range for data collection   | 3.434 to 29.596°.                                                  |                                          |
| Index ranges                      | -17 ≤ h ≤ 12, -24 ≤ k ≤ 15, -17 ≤ l ≤ 19                           |                                          |
| Reflections collected             | 16174                                                              |                                          |
| Independent reflections           | 7717 [R(int) = 0.0278]                                             |                                          |
| Completeness to theta = 25.242°   | 99.7 %                                                             |                                          |
| Refinement method                 | Full-matrix least-squares on F <sup>2</sup>                        |                                          |
| Data / restraints / parameters    | 7717 / 0 / 369                                                     |                                          |
| Goodness-of-fit on F <sup>2</sup> | 1.036                                                              |                                          |
| Final R indices [I > 2σ(I)]       | R1 = 0.0539, wR2 = 0.1289                                          |                                          |
| R indices (all data)              | R1 = 0.0722, wR2 = 0.1436                                          |                                          |
| Largest diff. peak and hole       | 1.857 and -0.896 e.Å <sup>-3</sup>                                 |                                          |

**Table S2.** Selected bond lengths [Å] and angles [°] for **(2)** [(dippe)Cu(PPh<sub>3</sub>)(NO<sub>3</sub>)]

---

|             |           |                  |            |
|-------------|-----------|------------------|------------|
| C(1)-C(2)   | 1.510(5)  | O(1)-Cu(1)-P(3)  | 97.27(7)   |
| C(1)-P(1)   | 1.842(4)  | O(1)-Cu(1)-P(2)  | 111.01(7)  |
| C(3)-C(5)   | 1.500(6)  | P(3)-Cu(1)-P(2)  | 124.54(3)  |
| C(3)-C(4)   | 1.517(6)  | O(1)-Cu(1)-P(1)  | 108.62(7)  |
| C(3)-P(1)   | 1.868(4)  | P(3)-Cu(1)-P(1)  | 125.08(3)  |
| C(15)-C(16) | 1.386(5)  | P(2)-Cu(1)-P(1)  | 90.25(3)   |
| C(15)-P(3)  | 1.828(3)  | O(3)-N(1)-O(2)   | 119.8(3)   |
| Cu(1)-O(1)  | 2.146(2)  | O(3)-N(1)-O(1)   | 119.2(3)   |
| Cu(1)-P(3)  | 2.2688(9) | O(2)-N(1)-O(1)   | 121.0(3)   |
| Cu(1)-P(2)  | 2.2904(9) | C(1)-P(1)-C(6)   | 104.7(2)   |
| Cu(1)-P(1)  | 2.2944(9) | C(15)-P(3)-Cu(1) | 116.01(11) |
| N(1)-O(3)   | 1.251(4)  |                  |            |
| N(1)-O(2)   | 1.253(4)  |                  |            |
| N(1)-O(1)   | 1.254(4)  |                  |            |

---

**Table S3.** Crystal data and structure refinement for **(3)** [(depe)Cu(PPh<sub>3</sub>)(NO<sub>3</sub>)]

| Identification code               | <b>(3)</b>                                                         |          |
|-----------------------------------|--------------------------------------------------------------------|----------|
| Empirical formula                 | C <sub>28</sub> H <sub>39</sub> Cu N O <sub>3</sub> P <sub>3</sub> |          |
| Formula weight                    | 594.05                                                             |          |
| Temperature                       | 130(2) K                                                           |          |
| Wavelength                        | 0.71073 Å                                                          |          |
| Crystal system                    | Orthorhombic                                                       |          |
| Space group                       | P 21 21 21                                                         |          |
| Unit cell dimensions              | a = 10.4119(11) Å                                                  | α = 90°. |
|                                   | b = 15.363(2) Å                                                    | β = 90°. |
|                                   | c = 18.5644(17) Å                                                  | γ = 90°. |
| Volume                            | 2969.5(6) Å <sup>3</sup>                                           |          |
| Z                                 | 4                                                                  |          |
| Density (calculated)              | 1.329 Mg/m <sup>3</sup>                                            |          |
| Absorption coefficient            | 0.926 mm <sup>-1</sup>                                             |          |
| F(000)                            | 1248                                                               |          |
| Crystal size                      | 0.290 x 0.190 x 0.060 mm <sup>3</sup>                              |          |
| Theta range for data collection   | 3.474 to 29.616°.                                                  |          |
| Index ranges                      | -14 ≤ h ≤ 14, -21 ≤ k ≤ 19, -22 ≤ l ≤ 24                           |          |
| Reflections collected             | 16522                                                              |          |
| Independent reflections           | 7018 [R(int) = 0.0646]                                             |          |
| Completeness to theta = 25.242°   | 99.6 %                                                             |          |
| Refinement method                 | Full-matrix least-squares on F <sup>2</sup>                        |          |
| Data / restraints / parameters    | 7018 / 0 / 329                                                     |          |
| Goodness-of-fit on F <sup>2</sup> | 1.088                                                              |          |
| Final R indices [I > 2σ(I)]       | R1 = 0.0535, wR2 = 0.0674                                          |          |
| R indices (all data)              | R1 = 0.0934, wR2 = 0.0821                                          |          |
| Absolute structure parameter      | -0.017(13)                                                         |          |
| Largest diff. peak and hole       | 0.585 and -0.637 e.Å <sup>-3</sup>                                 |          |

**Table S4.** Selected bond lengths [Å] and angles [°] for **(3)** [(depe)Cu(PPh<sub>3</sub>)(NO<sub>3</sub>)]

---

|             |            |                  |            |
|-------------|------------|------------------|------------|
| C(1)-C(2)   | 1.537(7)   | O(1)-Cu(1)-P(3)  | 99.13(10)  |
| C(1)-P(1)   | 1.828(6)   | O(1)-Cu(1)-P(2)  | 109.20(11) |
| C(3)-C(4)   | 1.532(7)   | P(3)-Cu(1)-P(2)  | 129.28(6)  |
| C(3)-P(1)   | 1.841(5)   | O(1)-Cu(1)-P(1)  | 112.16(11) |
| C(15)-C(16) | 1.391(7)   | P(3)-Cu(1)-P(1)  | 116.47(6)  |
| C(15)-P(3)  | 1.822(5)   | P(2)-Cu(1)-P(1)  | 90.84(5)   |
| Cu(1)-O(1)  | 2.090(3)   | O(2)-N(1)-O(3)   | 120.9(5)   |
| Cu(1)-P(3)  | 2.2323(13) | O(2)-N(1)-O(1)   | 120.7(5)   |
| Cu(1)-P(2)  | 2.2593(16) | O(3)-N(1)-O(1)   | 118.4(5)   |
| Cu(1)-P(1)  | 2.2759(16) | C(1)-P(1)-C(3)   | 104.4(3)   |
| N(1)-O(2)   | 1.230(5)   | C(6)-P(1)-C(3)   | 104.0(3)   |
| N(1)-O(3)   | 1.237(5)   | C(12)-P(2)-C(2)  | 102.0(3)   |
| N(1)-O(1)   | 1.273(5)   | C(12)-P(2)-C(9)  | 105.1(3)   |
|             |            | C(15)-P(3)-C(21) | 102.6(2)   |

---

**Table S5.** Crystal data and structure refinement for (5) [(dipf)Cu(NO<sub>3</sub>)]

| Identification code               | (5)                                                                   |                                                        |
|-----------------------------------|-----------------------------------------------------------------------|--------------------------------------------------------|
| Empirical formula                 | C <sub>22</sub> H <sub>36</sub> Cu Fe N O <sub>3</sub> P <sub>2</sub> |                                                        |
| Formula weight                    | 543.85                                                                |                                                        |
| Temperature                       | 130(2) K                                                              |                                                        |
| Wavelength                        | 0.71073 Å                                                             |                                                        |
| Crystal system                    | Triclinic                                                             |                                                        |
| Space group                       | P -1                                                                  |                                                        |
| Unit cell dimensions              | a = 8.6246(7) Å<br>b = 9.3841(6) Å<br>c = 17.1248(10) Å               | α = 91.601(5)°.<br>β = 97.997(6)°.<br>γ = 100.216(6)°. |
| Volume                            | 1348.77(16) Å <sup>3</sup>                                            |                                                        |
| Z                                 | 2                                                                     |                                                        |
| Density (calculated)              | 1.339 Mg/m <sup>3</sup>                                               |                                                        |
| Absorption coefficient            | 1.465 mm <sup>-1</sup>                                                |                                                        |
| F(000)                            | 568                                                                   |                                                        |
| Crystal size                      | 0.160 x 0.130 x 0.080 mm <sup>3</sup>                                 |                                                        |
| Theta range for data collection   | 3.568 to 29.590°.                                                     |                                                        |
| Index ranges                      | -11 ≤ h ≤ 11, -13 ≤ k ≤ 12, -23 ≤ l ≤ 23                              |                                                        |
| Reflections collected             | 29144                                                                 |                                                        |
| Independent reflections           | 6766 [R(int) = 0.0493]                                                |                                                        |
| Completeness to theta = 25.242°   | 99.7 %                                                                |                                                        |
| Refinement method                 | Full-matrix least-squares on F <sup>2</sup>                           |                                                        |
| Data / restraints / parameters    | 6766 / 0 / 279                                                        |                                                        |
| Goodness-of-fit on F <sup>2</sup> | 1.032                                                                 |                                                        |
| Final R indices [I > 2σ(I)]       | R1 = 0.0335, wR2 = 0.0646                                             |                                                        |
| R indices (all data)              | R1 = 0.0512, wR2 = 0.0722                                             |                                                        |
| Largest diff. peak and hole       | 0.493 and -0.370 e.Å <sup>-3</sup>                                    |                                                        |

**Table S6.** Selected bond lengths [Å] and angles [°] for **(5)** [(dipf)Cu(NO<sub>3</sub>)]

|             |            |                   |            |
|-------------|------------|-------------------|------------|
| C(3)-C(5)   | 1.534(3)   | O(1)-Cu(1)-P(1)   | 122.00(5)  |
| C(3)-C(4)   | 1.537(3)   | O(1)-Cu(1)-P(2)   | 113.29(4)  |
| C(6)-P(1)   | 1.852(2)   | P(1)-Cu(1)-P(2)   | 117.96(2)  |
| C(9)-P(2)   | 1.8553(19) | O(1)-Cu(1)-O(2)   | 58.44(6)   |
| C(12)-P(2)  | 1.859(2)   | P(1)-Cu(1)-O(2)   | 117.31(4)  |
| C(15)-C(16) | 1.436(3)   | P(2)-Cu(1)-O(2)   | 114.09(5)  |
| C(15)-P(2)  | 1.816(2)   | C(19)-Fe(1)-C(23) | 140.20(8)  |
| C(20)-C(21) | 1.444(3)   | C(19)-Fe(1)-C(21) | 139.37(8)  |
| C(20)-P(1)  | 1.812(2)   | C(15)-Fe(1)-C(16) | 40.79(8)   |
| Cu(1)-O(1)  | 2.1598(15) | O(3)-N(1)-O(2)    | 122.0(2)   |
| Cu(1)-P(1)  | 2.2305(6)  | O(3)-N(1)-O(1)    | 121.3(2)   |
| Cu(1)-P(2)  | 2.2383(6)  | O(2)-N(1)-O(1)    | 116.70(18) |
| Cu(1)-O(2)  | 2.2580(16) | C(6)-P(1)-C(3)    | 106.05(9)  |
| N(1)-O(3)   | 1.239(2)   | C(9)-P(2)-C(12)   | 103.59(9)  |
| N(1)-O(2)   | 1.264(2)   |                   |            |
| N(1)-O(1)   | 1.271(2)   |                   |            |

**Table S7.** Overpotential values ( $\eta$ ) for the Cu(I) compounds-

| Compound | $\eta_{\text{NHE}}$ (V) |
|----------|-------------------------|
| Cu-1     | 0.348                   |
| Cu-2     | 0.39                    |
| Cu-3     | 0.35                    |
| Cu-4     | 0.30                    |
| Cu-5     | 0.43                    |



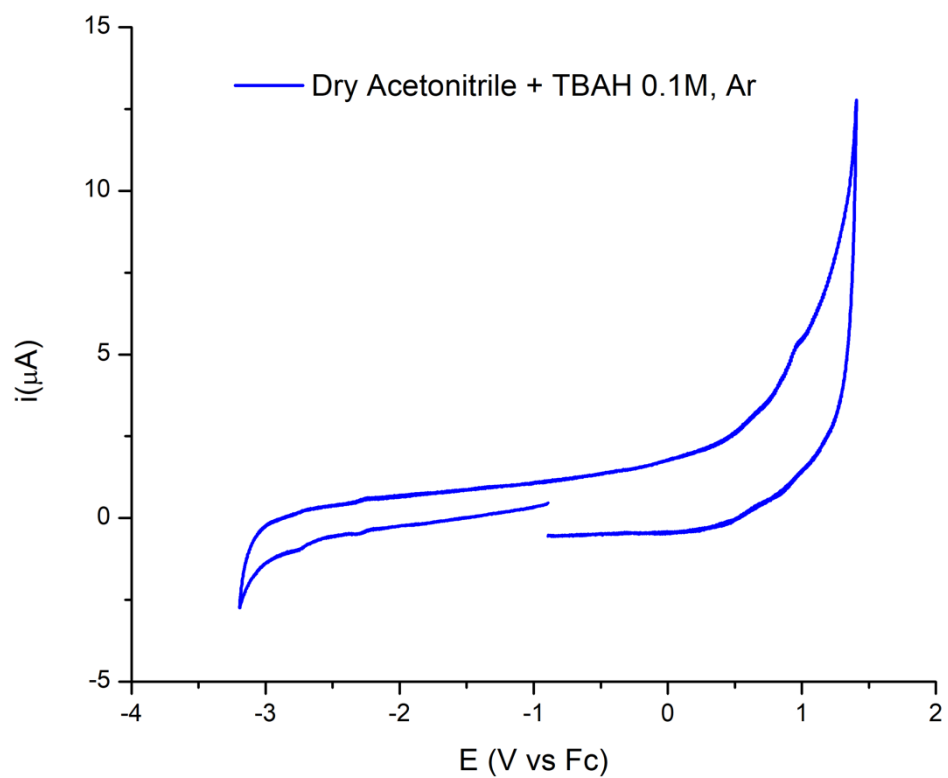

**Figure S25.** CV trace for dry acetonitrile.

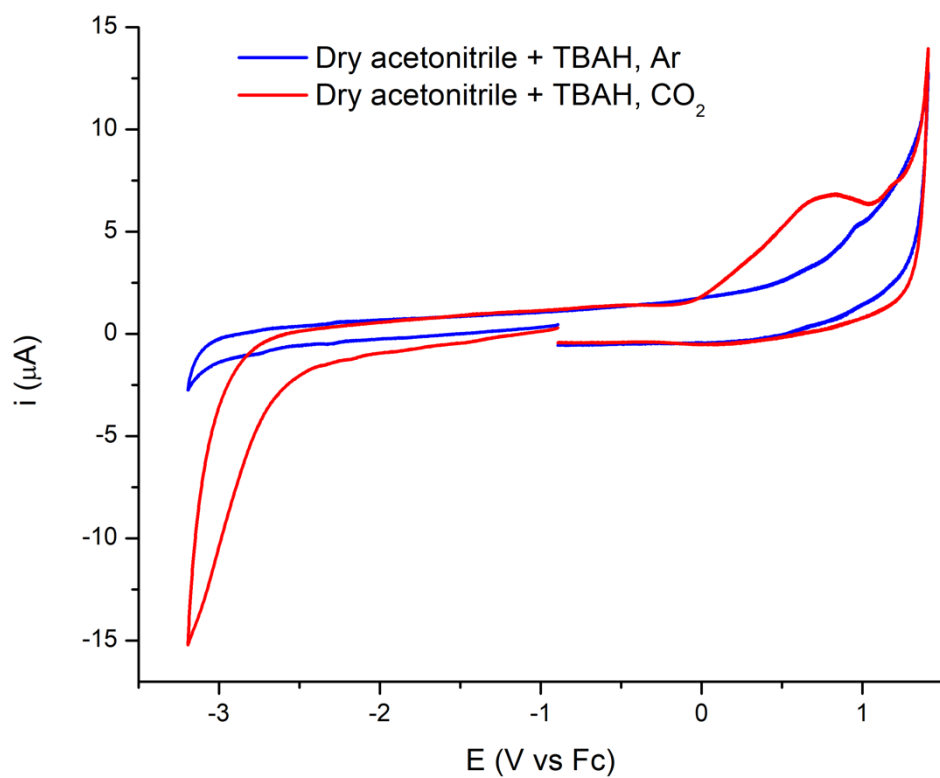

**Figure S26.** CV trace for dry acetonitrile and  $\text{CO}_2$ .

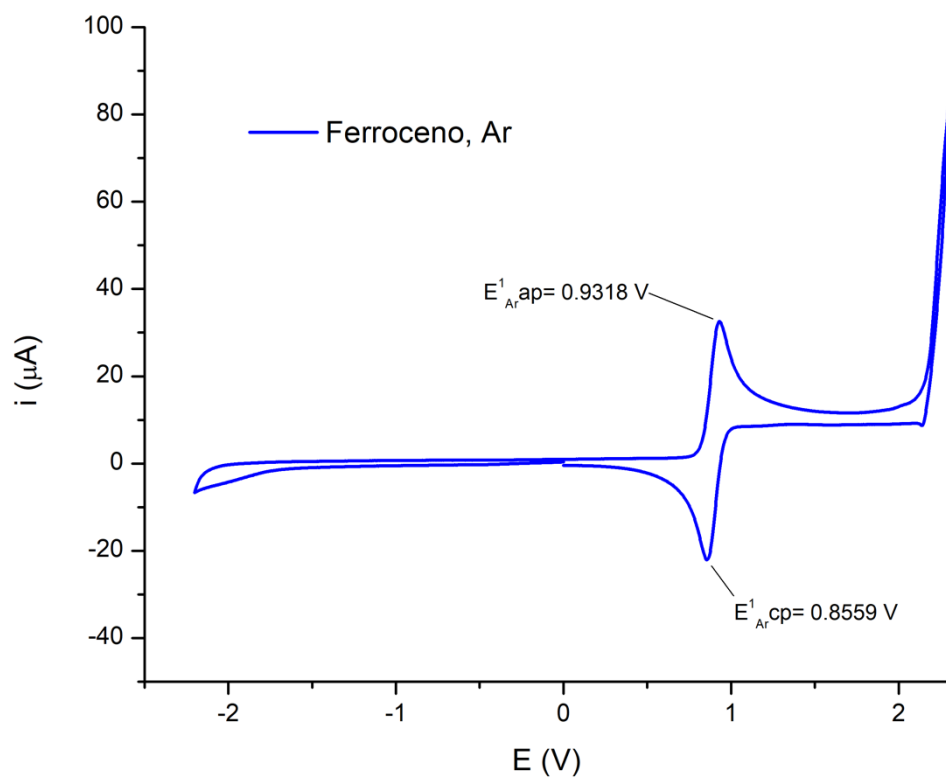

**Figure S27.** CV trace for ferrocene/ferrocinium pair.

*Electrochemical Data for Cu(I) compounds.*

## **ANODIC PEAKS ASSIGNMENT OF PHOSPHINES FOR Cu(I) COMPOUNDS**

For compound (**2**), anodic peaks L1 were assigned to the oxidation process corresponding to dippe ligand while anodic peak L2 corresponds to the sum of PPh<sub>3</sub> oxidation and to the second oxidation process for dippe ligand.

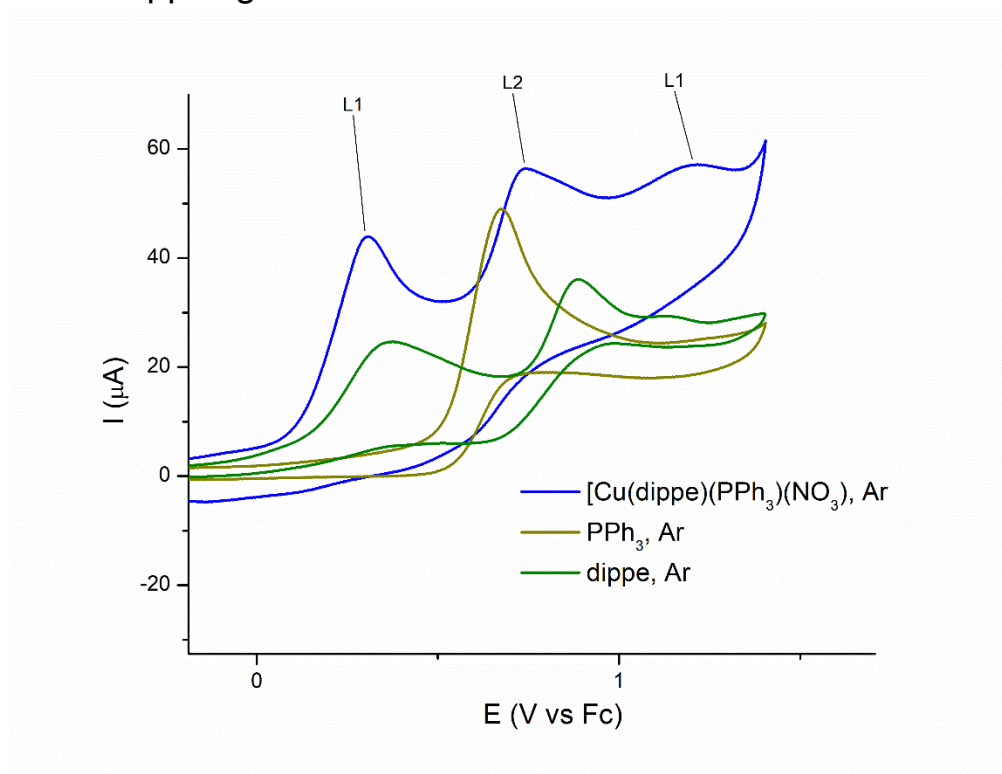

Figure S28. Anodic peaks assignments corresponding to phosphine ligands in compound (**2**)

For compound (3), L5 peak was assigned to the first oxidation of depe ligand. Anodic peak L2 + L5 corresponds to the sum of oxidation processes for PPh<sub>3</sub> and depe second oxidation process.

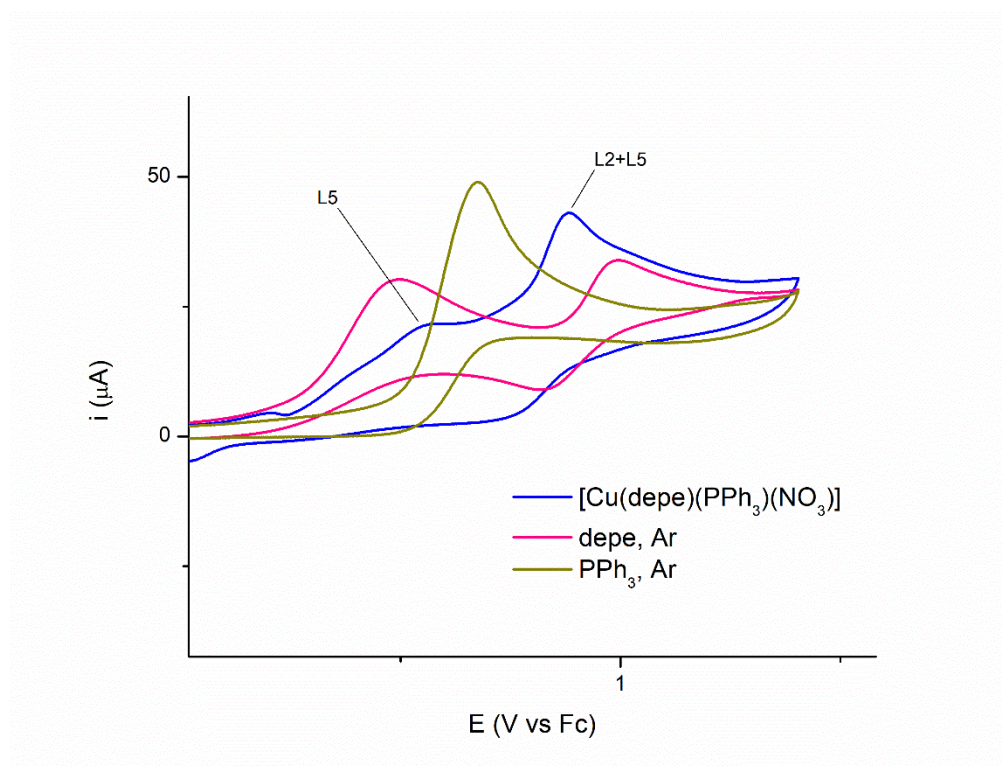

Figure S29. Assignment of anodic peaks of the phosphine ligands for compound (3)

For compound (4), L2 peak was assigned to the oxidation processes for PPh<sub>3</sub> and L3 peak corresponds to the oxidation of DIPHOS.

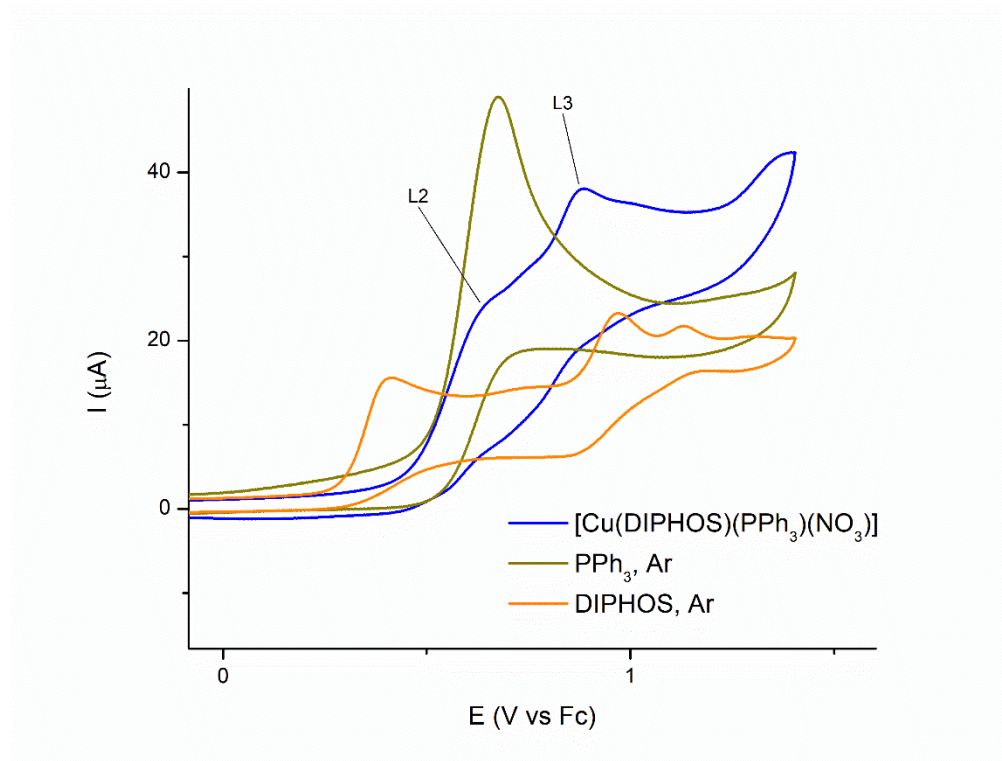

Figure S30. Assignment of anodic peaks of the phosphine ligands for compound (4)

Compound  $[\text{Cu}(\text{dipf})\text{NO}_3]$  (**5**).

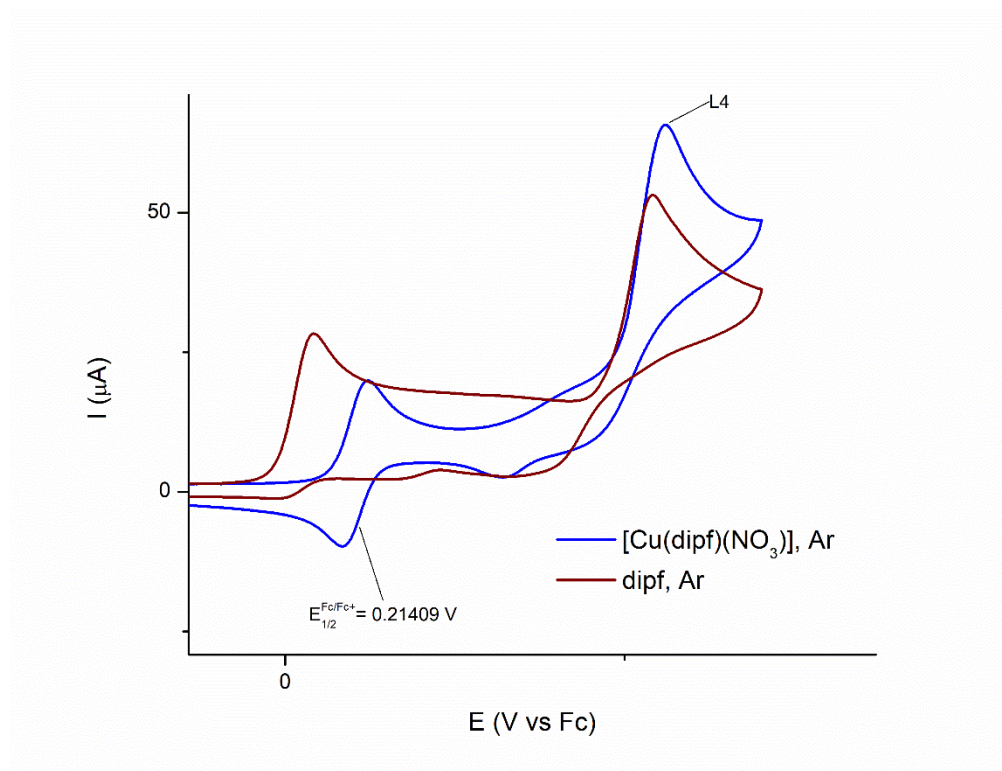

Figure S31. Assignment of anodic peaks of the phosphine ligands for compound (**5**)

L4 peak corresponds to the oxidation of dipf ligand, in Compound (**5**),

## COMPOUND (2) BEHAVIOR UNDER Ar AND CO<sub>2</sub> ATMOSPHERE AND DIFFERENT PROTIC MEDIA.

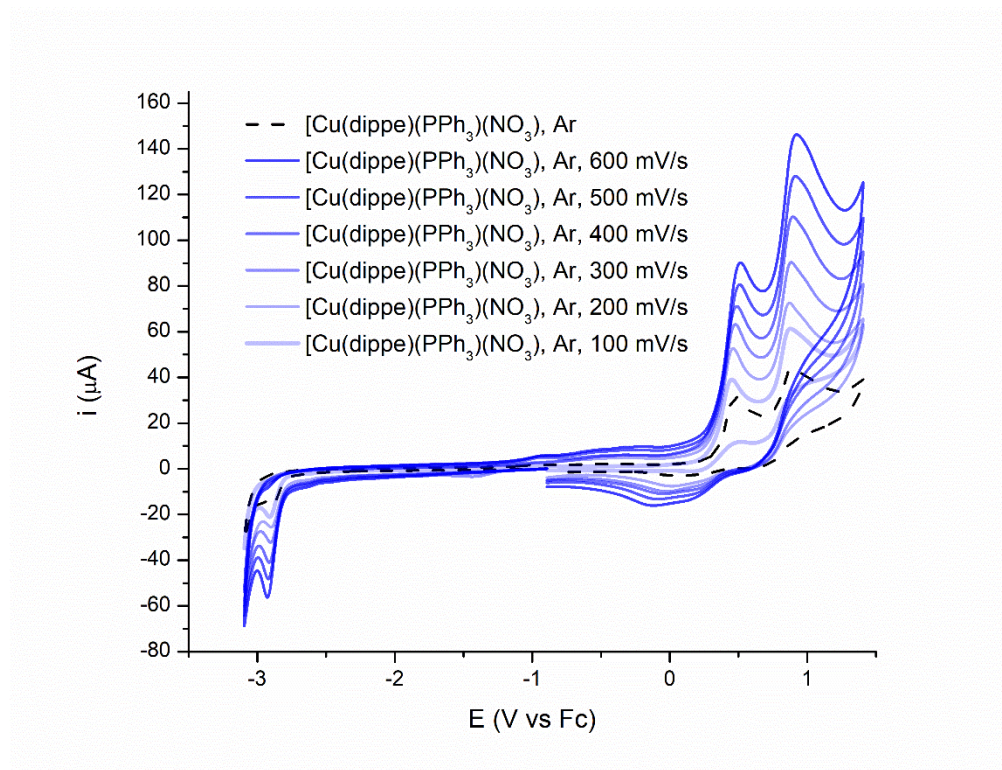

Figure S32. Compound (2) behavior with different scanning speeds in Ar atmosphere



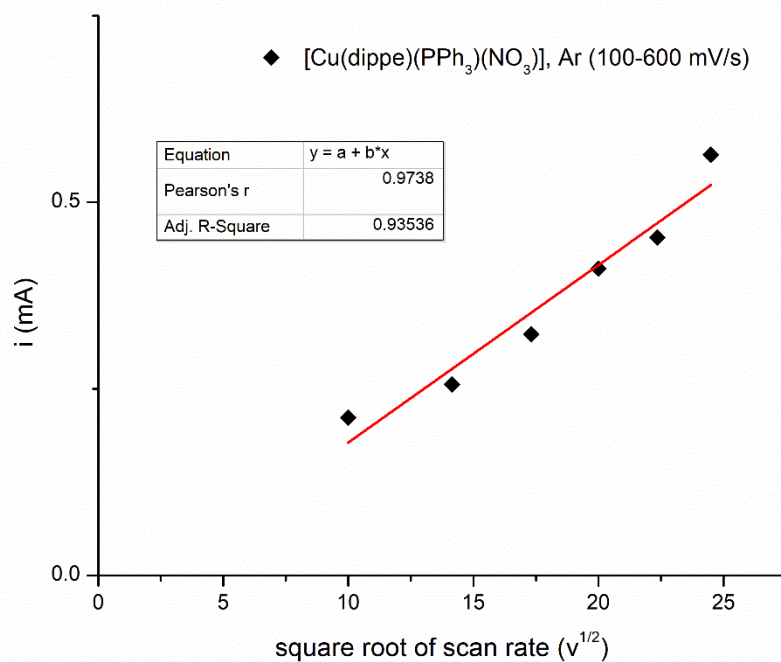

Figure S33. Pseudo-first-order behavior of the cathodic process of Compound (2)

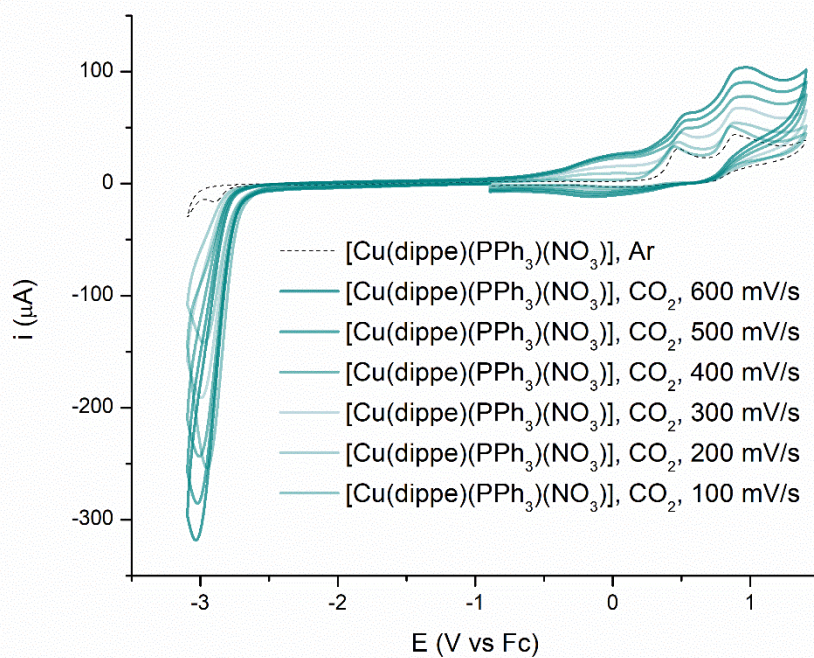

Figure S34. Compound (2) behavior with different scanning speeds in CO<sub>2</sub> atmosphere

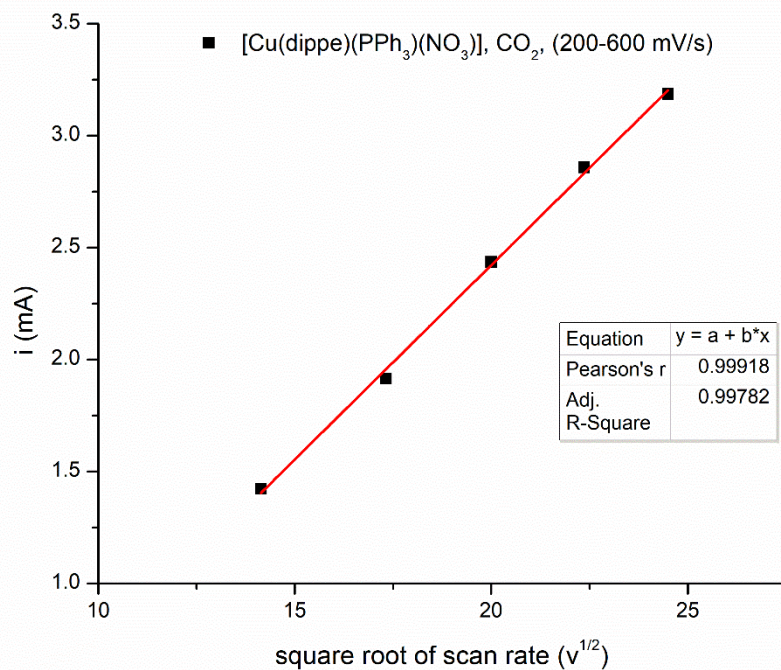

Figure S35. Pseudo-first-order behavior of the cathodic process of Compound (**2**) with CO<sub>2</sub>.

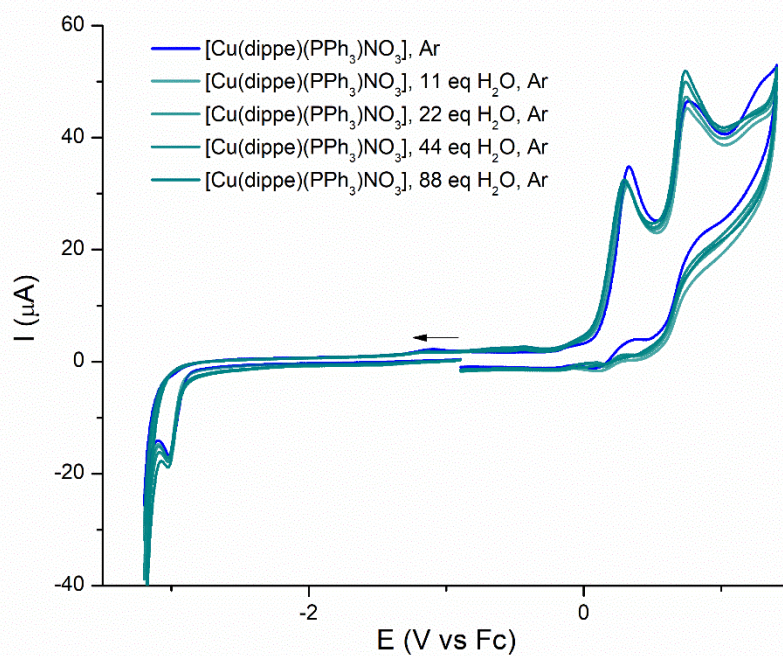

Figure S36. Compound (**2**) behavior with variable water equivalents under Ar atmosphere.

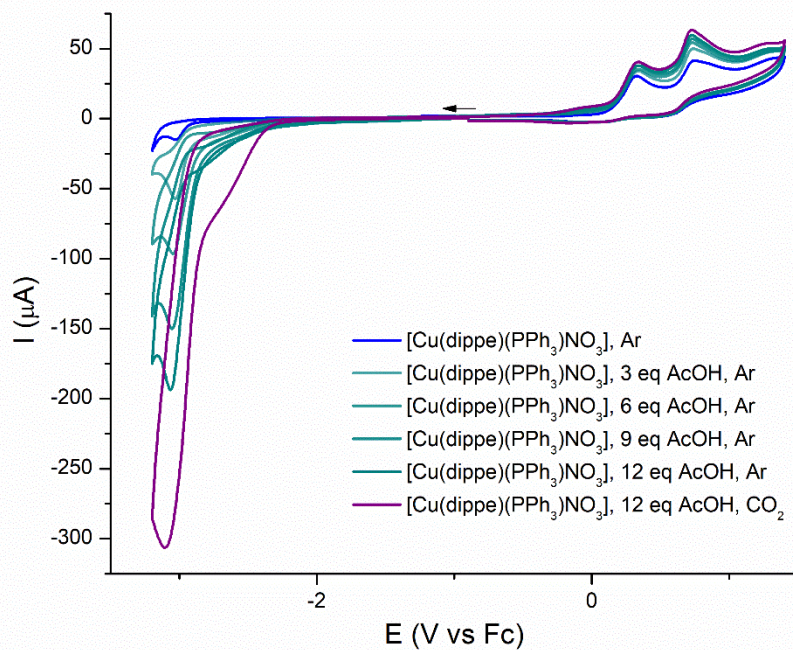

Figure S37. Compound (2) behavior with variable acetic acid equivalents under Ar and  $\text{CO}_2$  atmosphere.

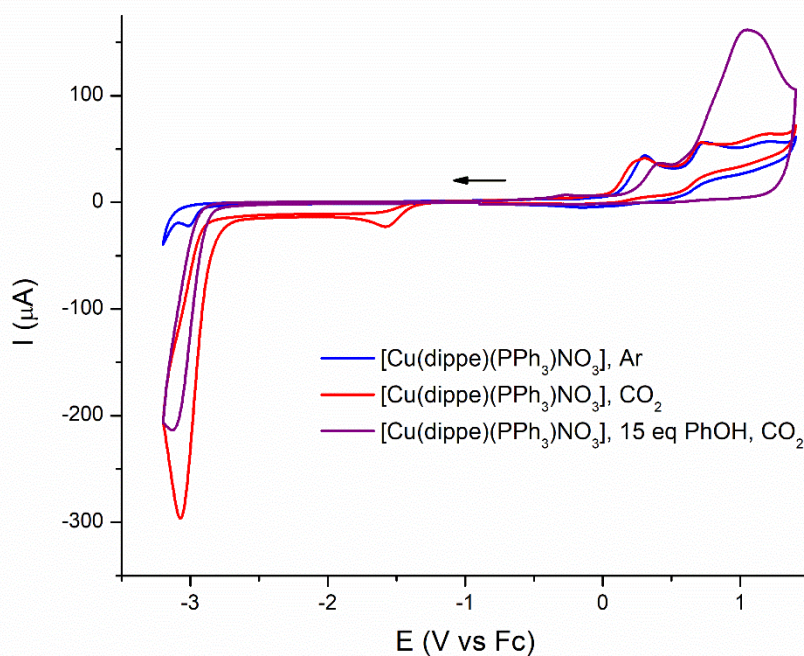

Figure S38. Compound (2) behavior with variable phenol equivalents and inhibition of the  $\text{CO}_2$ RR process.

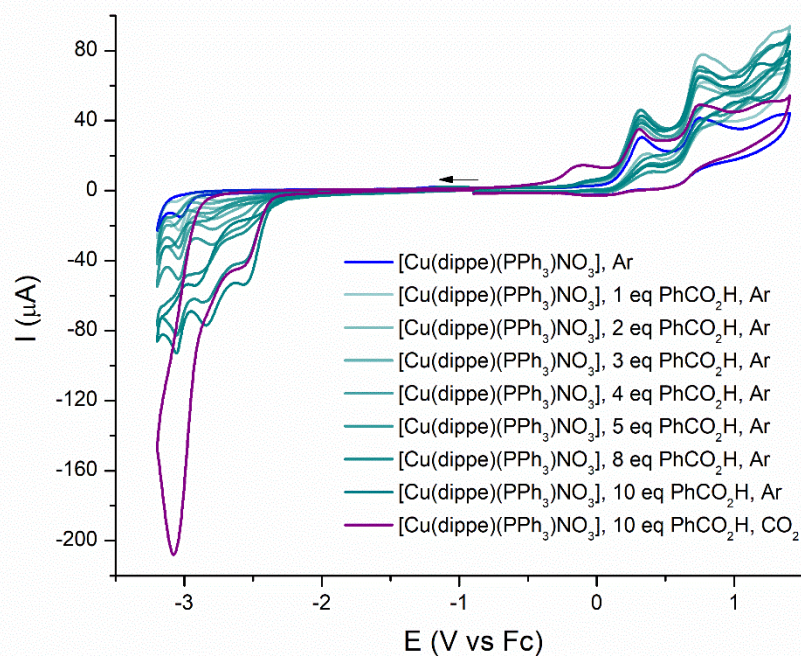

Figure S39. Compound (**2**) behavior with variable benzoic acid equivalents under Ar and CO<sub>2</sub> atmosphere.

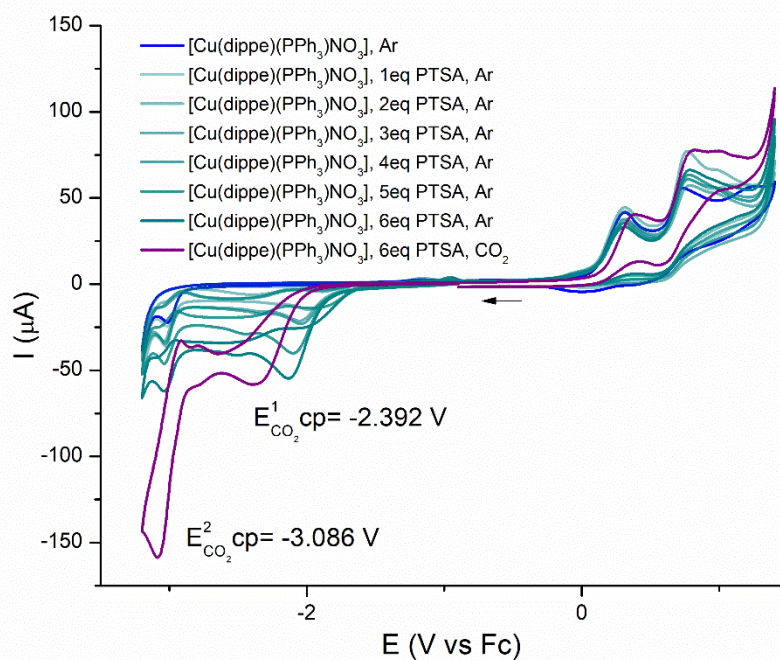

Figure S40. Compound (**2**) behavior with PTSA equivalents under Ar and CO<sub>2</sub> atmosphere.

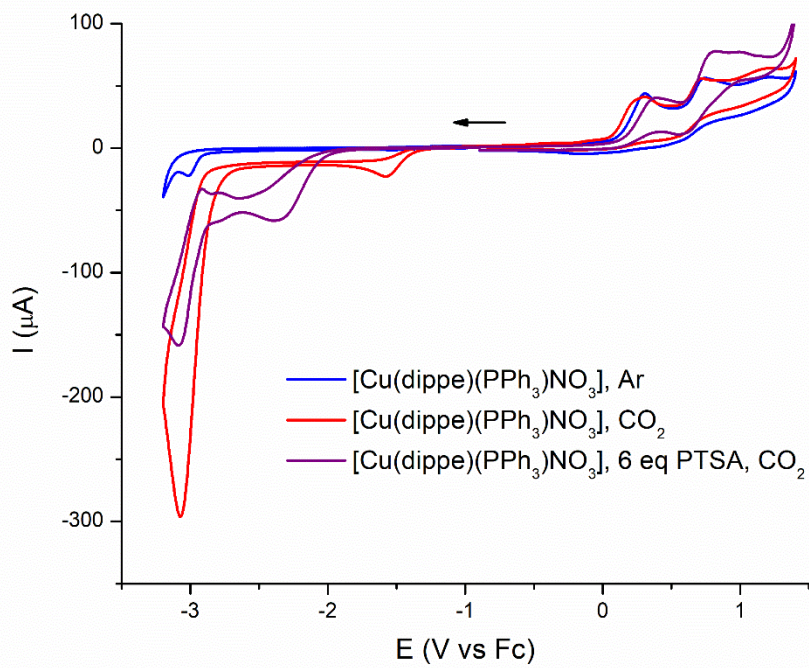

Figure S41. Compound (**2**) behavior with PTSA equivalents and inhibition of the  $\text{CO}_2\text{RR}$  process.

Compound (1),  $[\text{Cu}(\text{PPh}_3)_2\text{NO}_3]$ .

**COMPOUND (1) BEHAVIOR UNDER Ar AND CO<sub>2</sub> ATMOSPHERE AND DIFFERENT PROTIC MEDIA.**

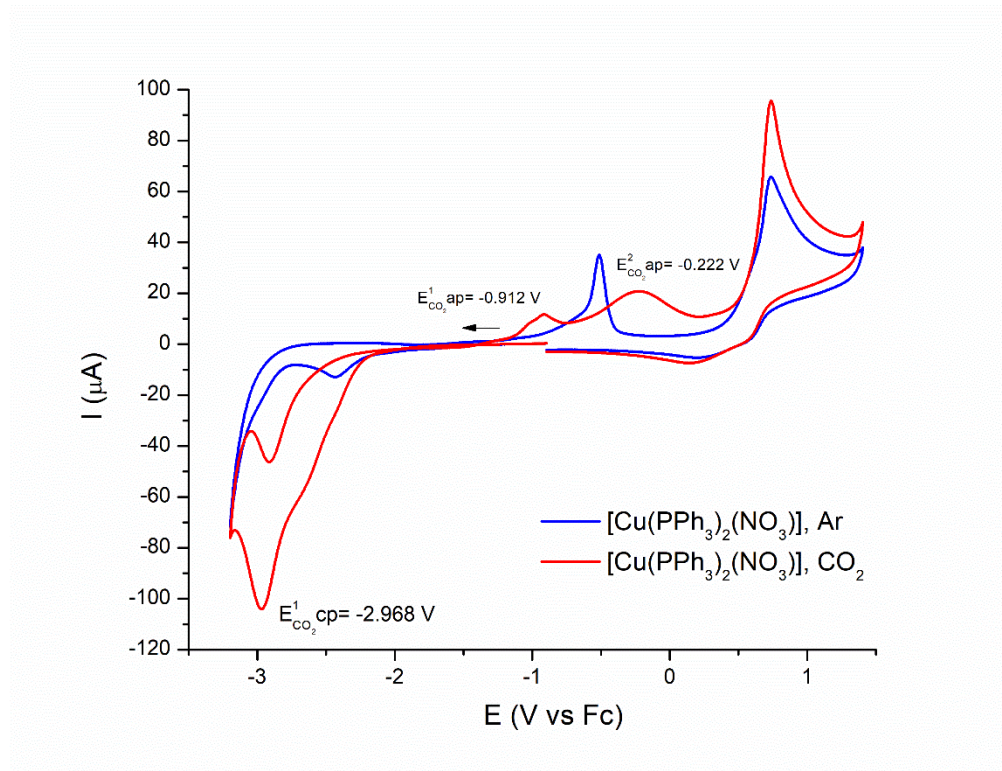

Figure S42. Compound (1) under Ar and CO<sub>2</sub> atmosphere.

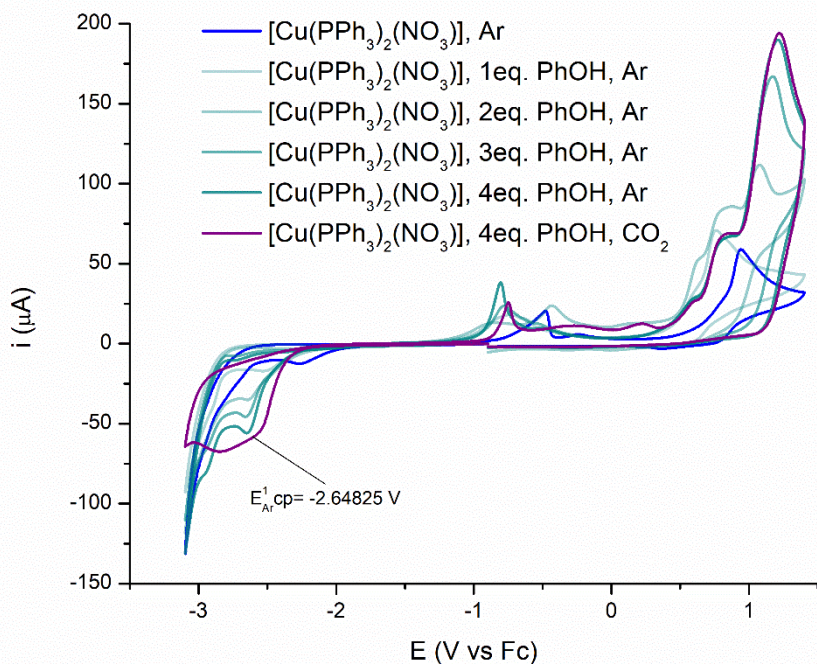

Figure S43. Compound (1) behavior with variable phenol equivalents under Ar and CO<sub>2</sub> atmosphere.

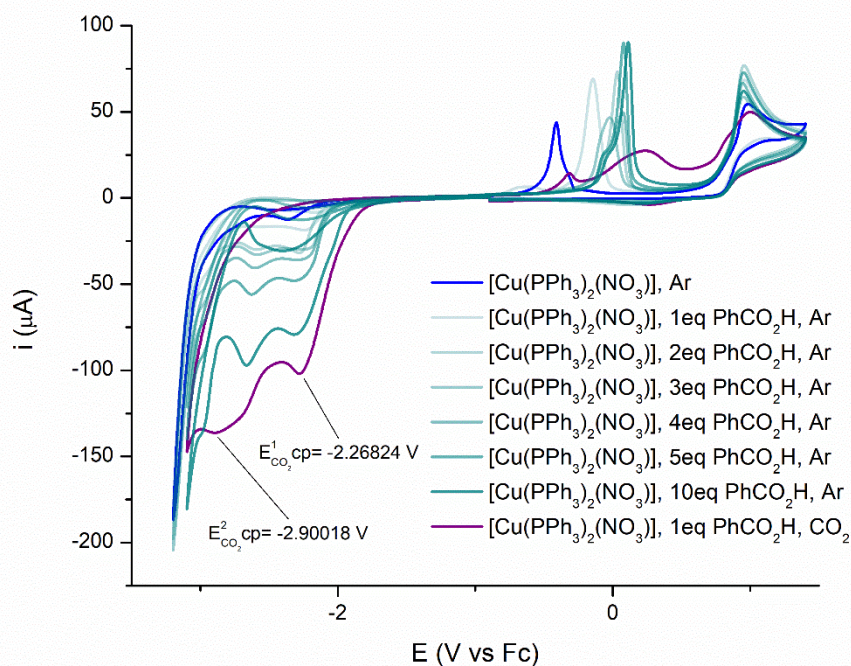

Figure S44. Compound (1) behavior with variable benzoic acid equivalents under Ar and CO<sub>2</sub> atmosphere.

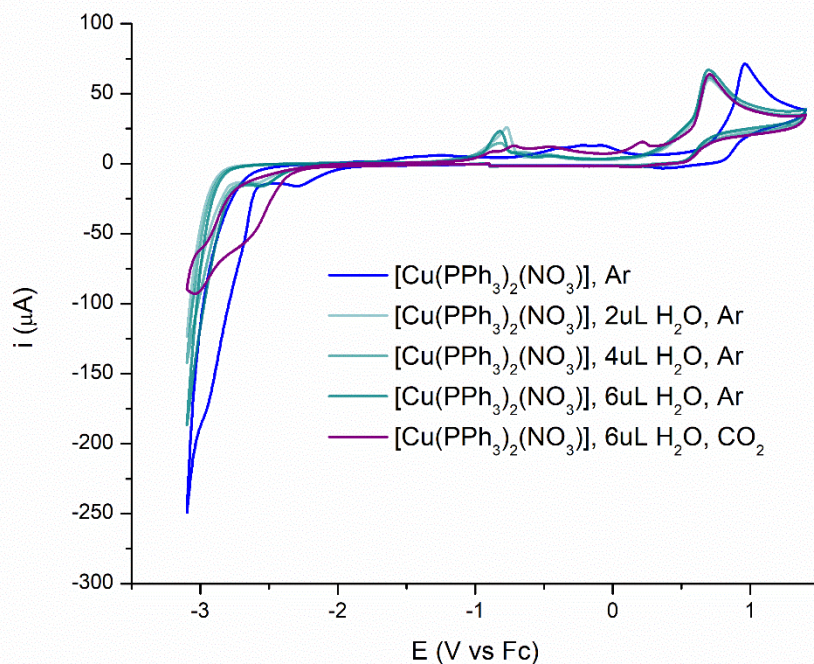

Figure S45. Compound (1) behavior with variable water equivalents under Ar and  $\text{CO}_2$  atmosphere.

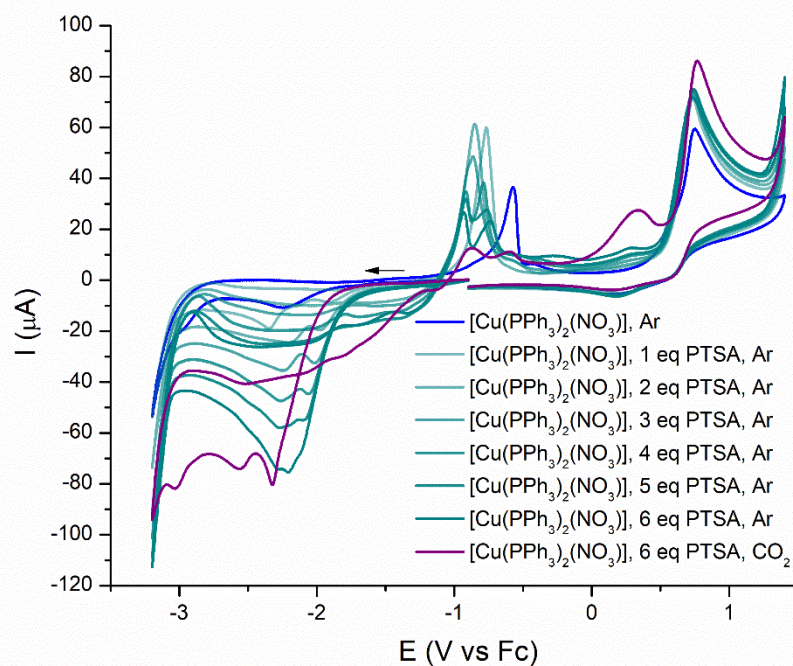

Figure S46. Compound (1) behavior with variable PTSA equivalents under Ar and  $\text{CO}_2$  atmosphere.



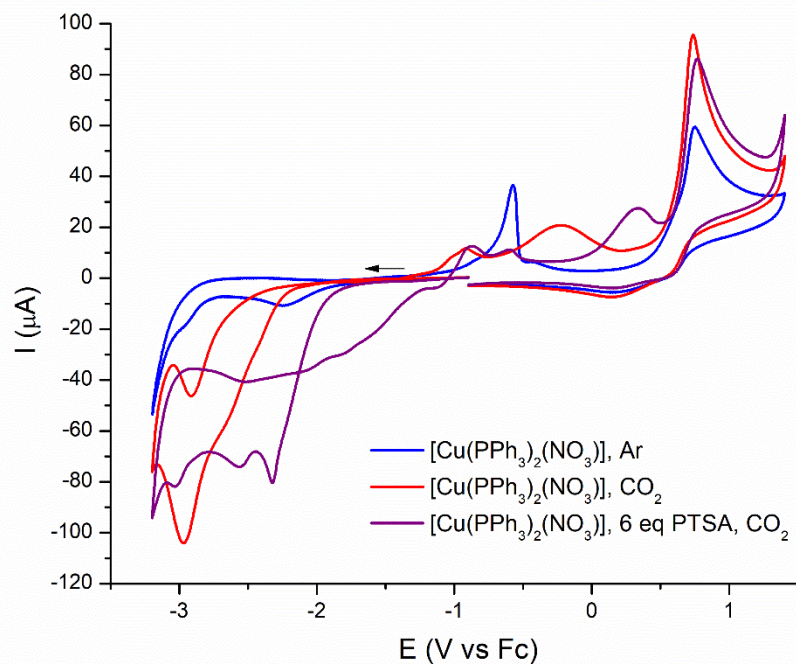

Figure S47. Compound (1) behavior with variable PTSA equivalents and inhibition of the  $\text{CO}_2\text{RR}$  process.

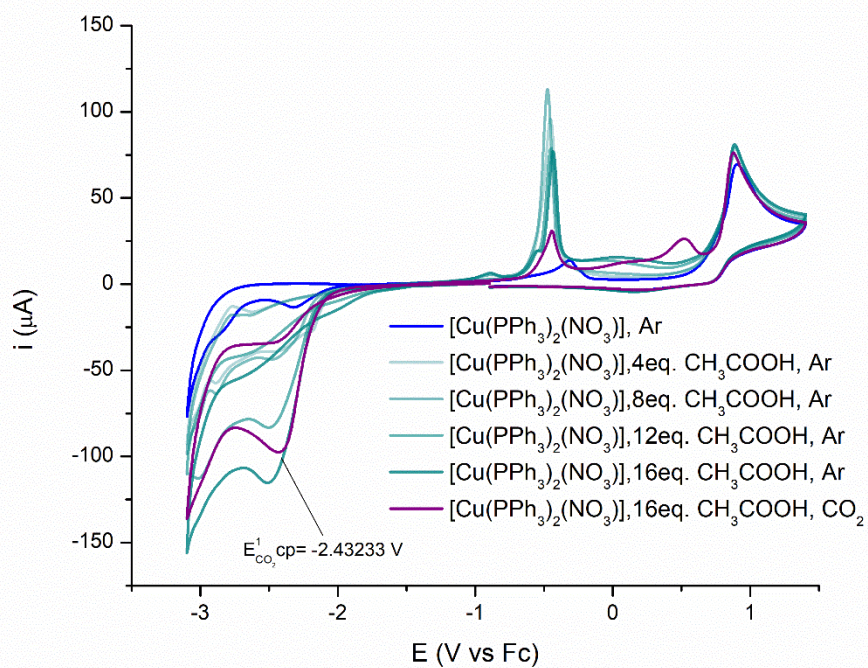

Figure S48. Compound (1) behavior with variable acetic acid equivalents under Ar and  $\text{CO}_2$  atmosphere.

Compound (3), [Cu(depe)(PPh<sub>3</sub>)(NO<sub>3</sub>)].

**COMPOUND (3) BEHAVIOR UNDER Ar AND CO<sub>2</sub> ATMOSPHERE,  
AND DIFFERENT PROTIC MEDIA.**

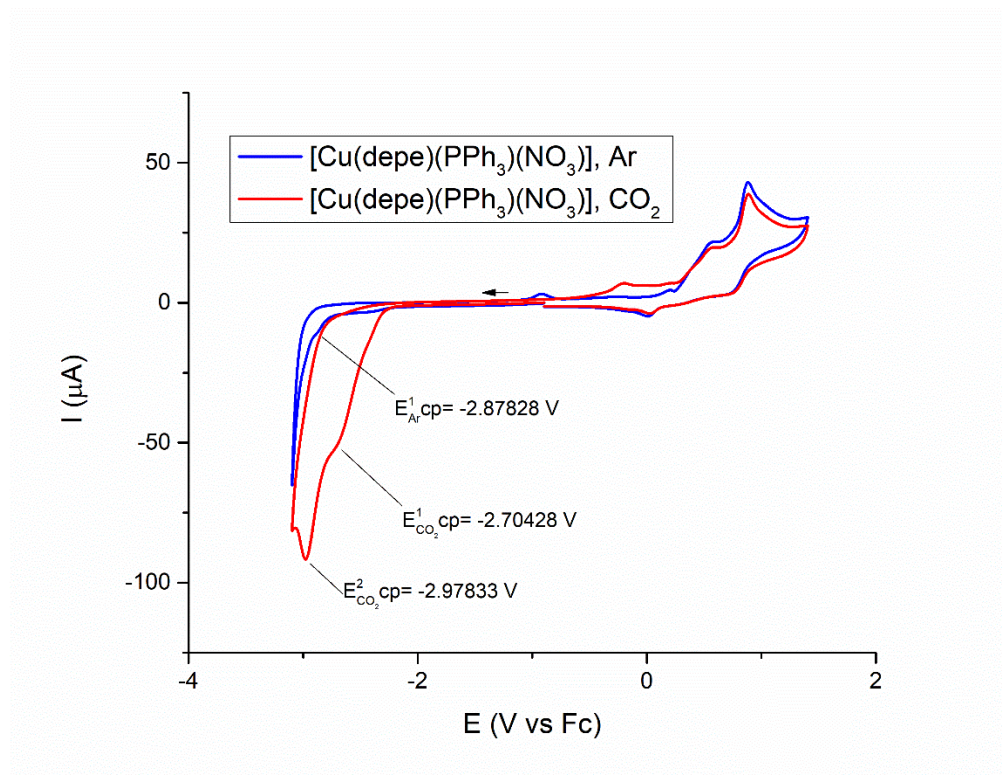

Figure S49. Compound (3) under Ar and CO<sub>2</sub> atmosphere.

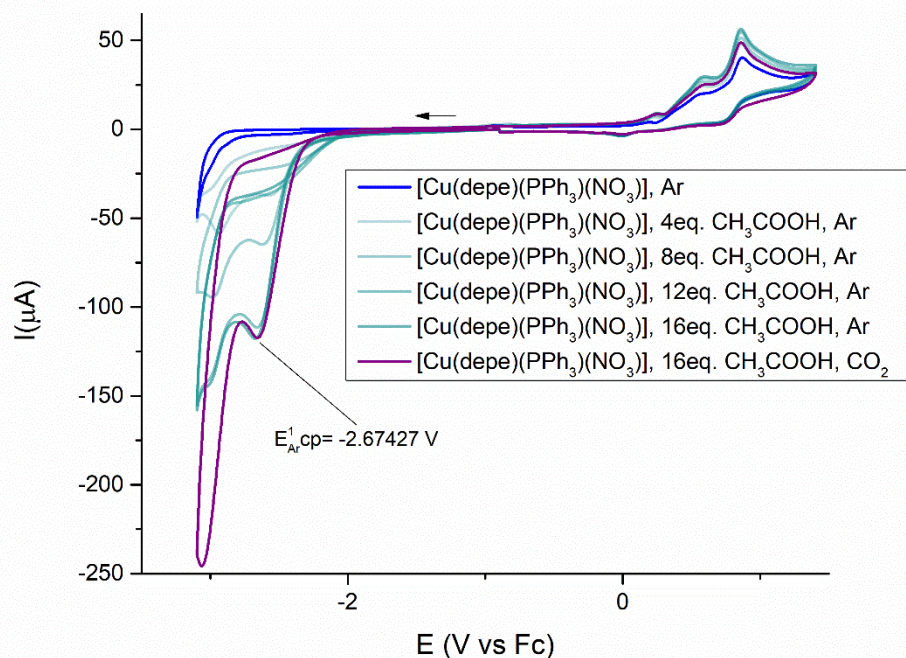

Figure S50. Compound **(3)** behavior with variable acetic acid equivalents under Ar and CO<sub>2</sub> atmosphere.

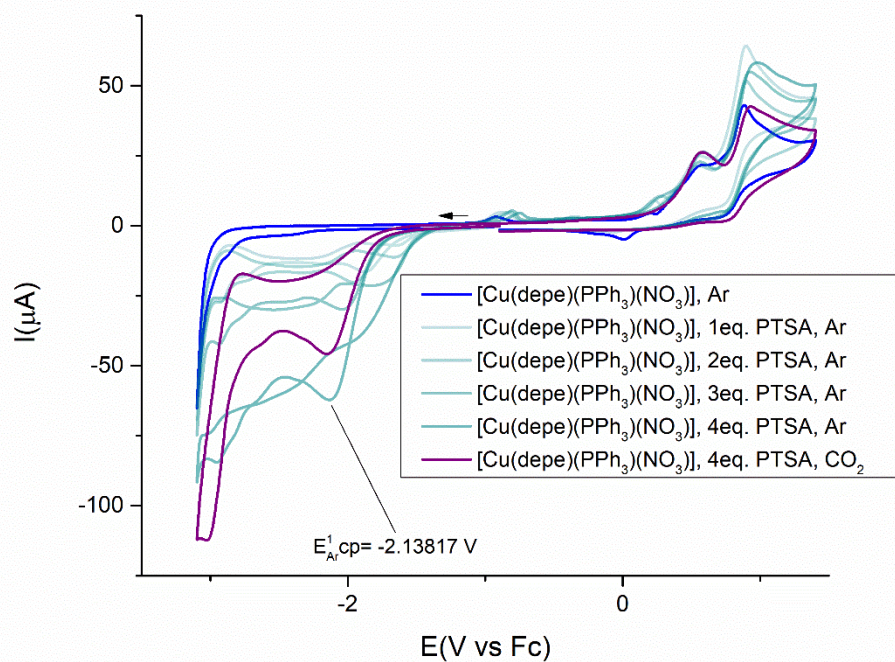

Figure S51. Compound **(3)** behavior with variable PTSA equivalents under Ar and CO<sub>2</sub> atmosphere.

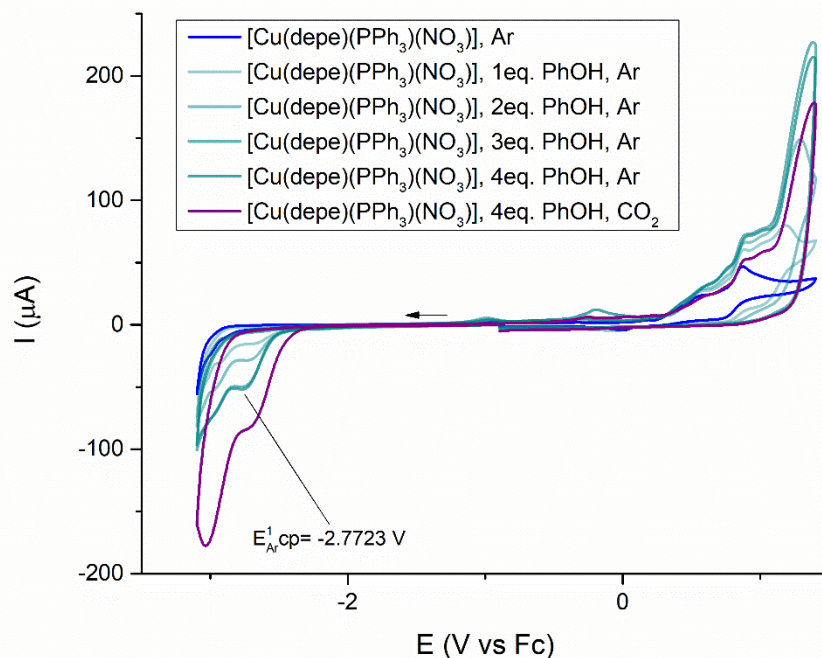

Figure S52. Compound (3) behavior with variable phenol equivalents under Ar and CO<sub>2</sub> atmosphere.

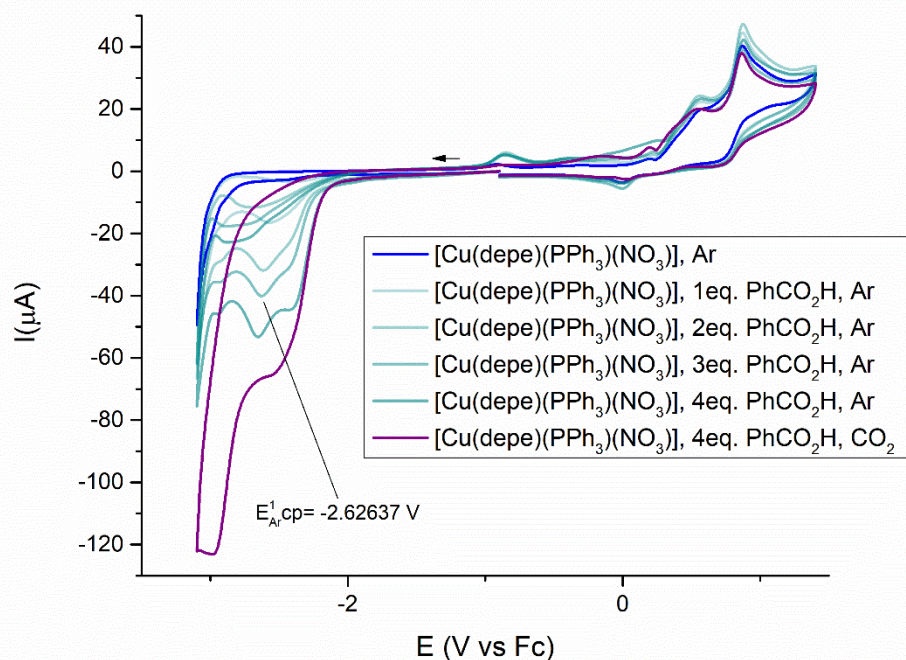

Figure S53. Compound (3) behavior with variable benzoic acid equivalents under Ar and CO<sub>2</sub> atmosphere.

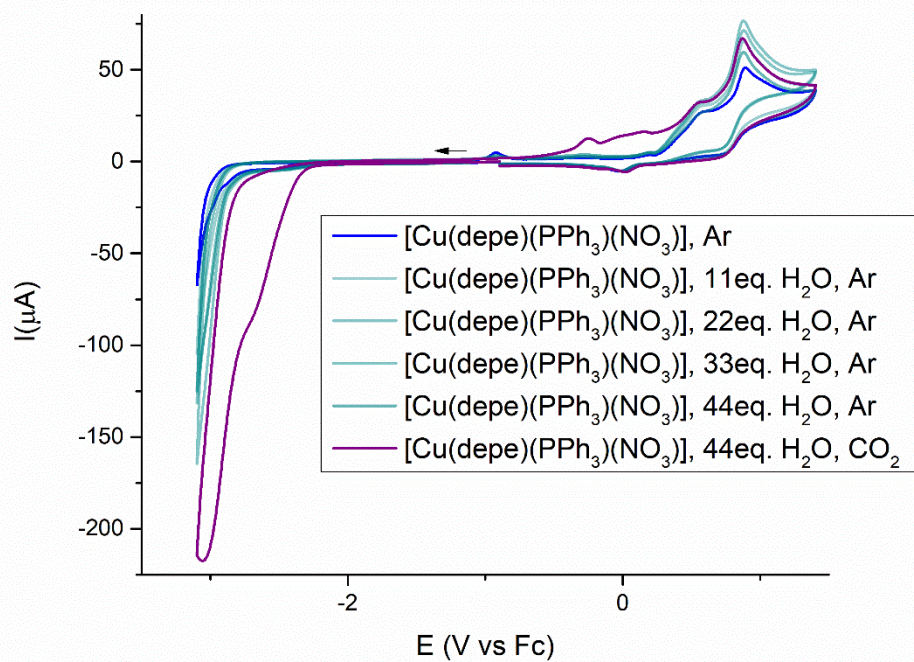

Figure S54. Compound (3) behavior with variable water equivalents under Ar and CO<sub>2</sub> atmosphere.

Compound (4), [Cu(dppe)(PPh<sub>3</sub>)(NO<sub>3</sub>)].

**COMPOUND (4) BEHAVIOR UNDER Ar AND CO<sub>2</sub> ATMOSPHERE,  
AND DIFFERENT PROTIC MEDIA.**

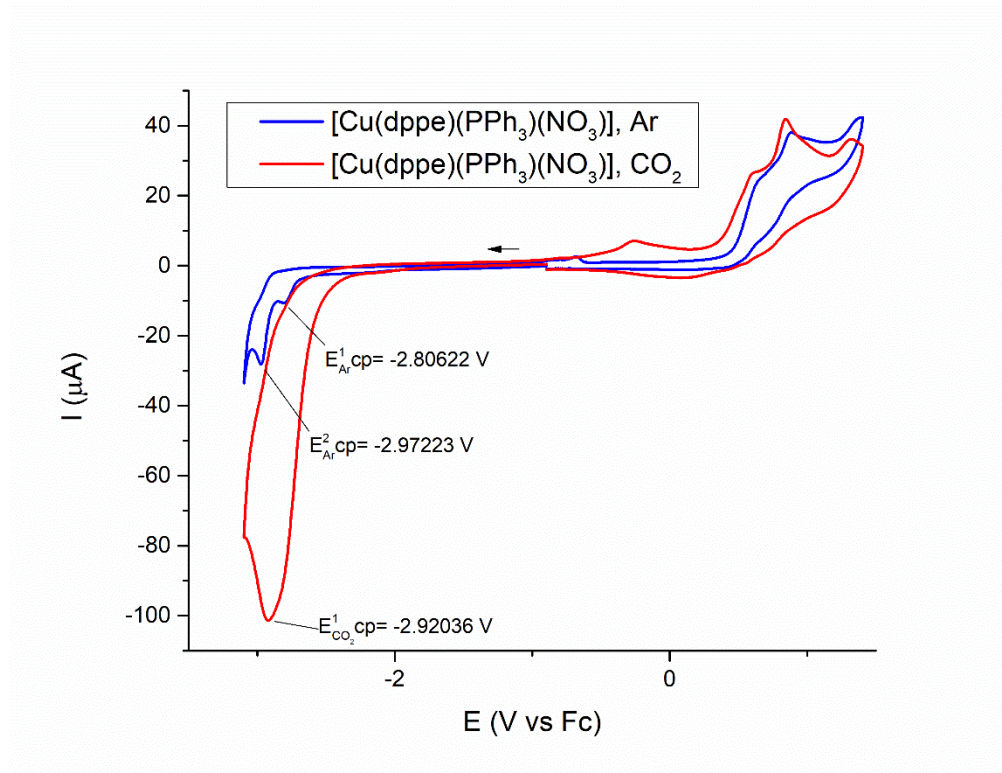

Figure S55. Compound (4) under Ar and CO<sub>2</sub> atmosphere.

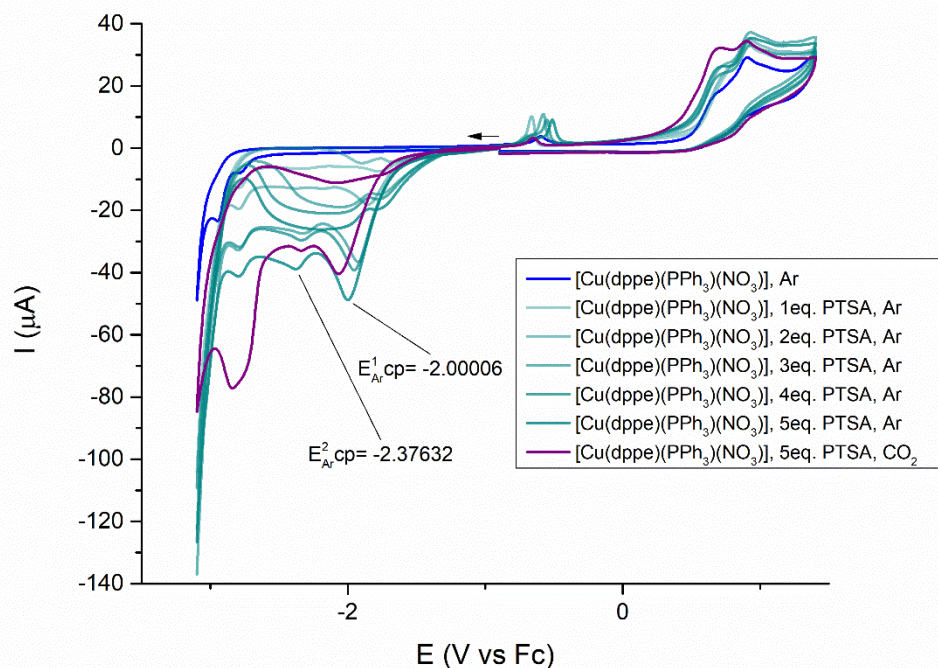

Figure S56. Compound (4) behavior with variable PTSA equivalents under Ar and CO<sub>2</sub> atmosphere.

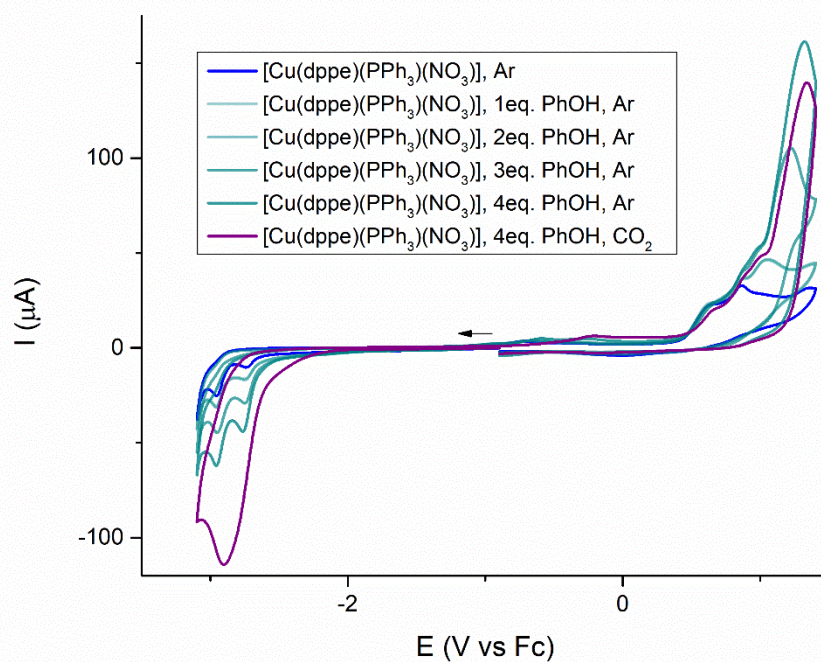

Figure S57. Compound (4) behavior with variable phenol equivalents under Ar and CO<sub>2</sub> atmosphere.

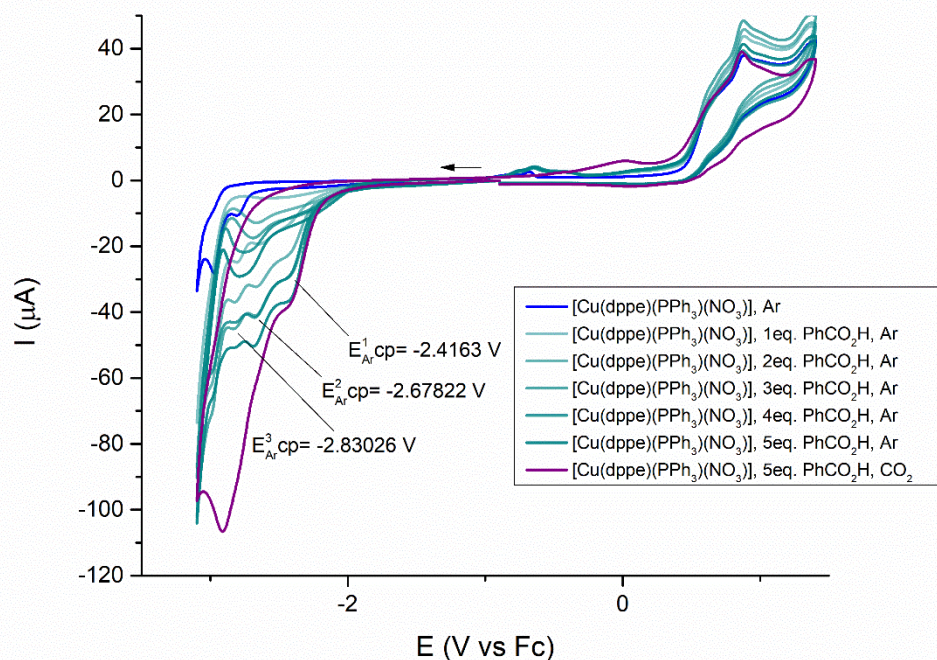

Figure S58. Compound (**4**) behavior with variable benzoic acid equivalents under Ar and CO<sub>2</sub> atmosphere.

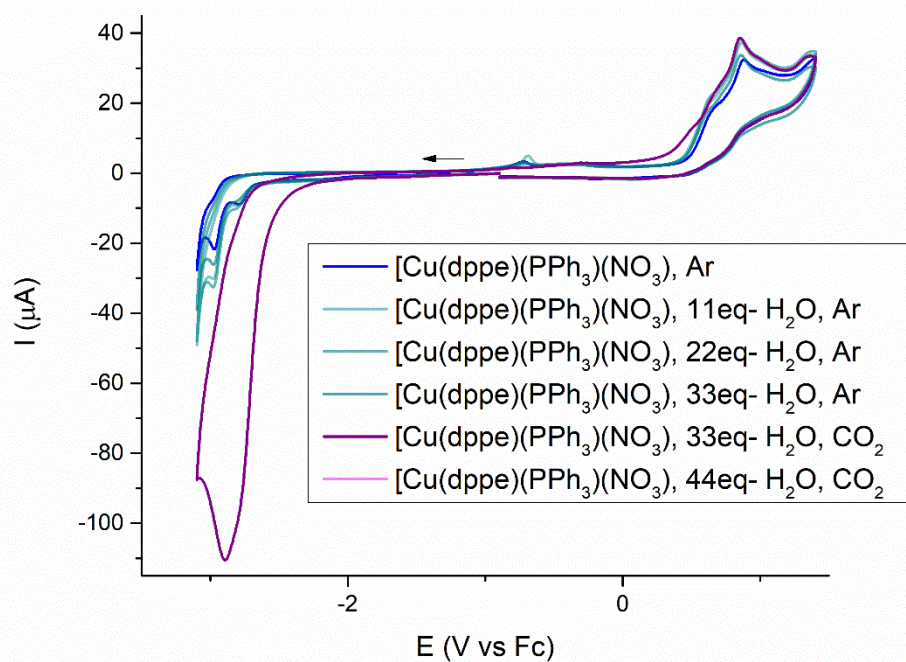

Figure S59. Compound (**4**) behavior with variable water equivalents under Ar and CO<sub>2</sub> atmosphere.



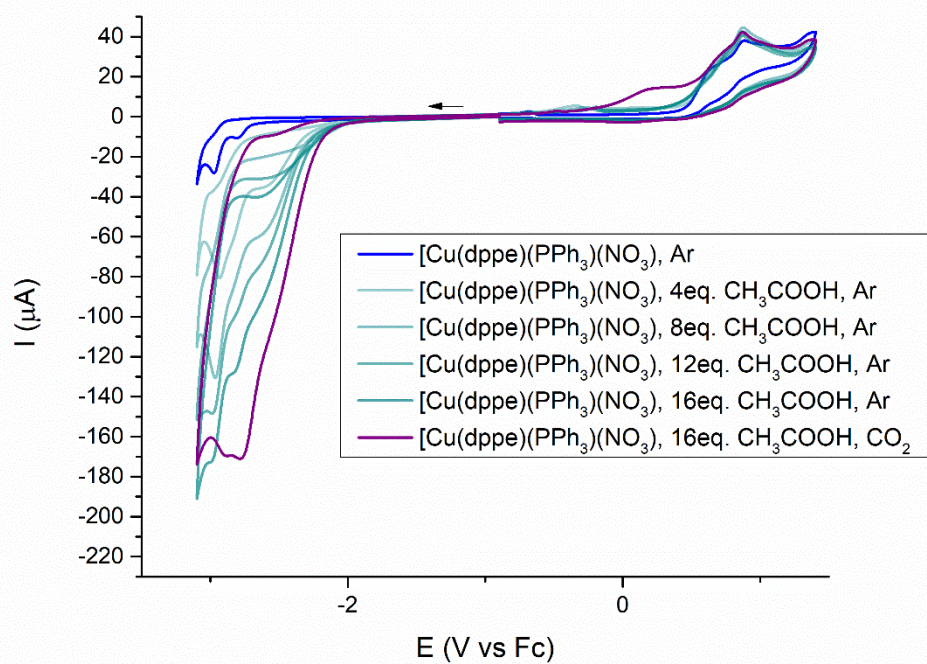

Figure S60. Compound (4) behavior with variable acetic acid equivalents under Ar and  $\text{CO}_2$  atmosphere.

Compound (5), [Cu(dippf)NO<sub>3</sub>].

**COMPOUND (5) BEHAVIOR UNDER Ar AND CO<sub>2</sub> ATMOSPHERE,  
AND DIFFERENT PROTIC MEDIA.**

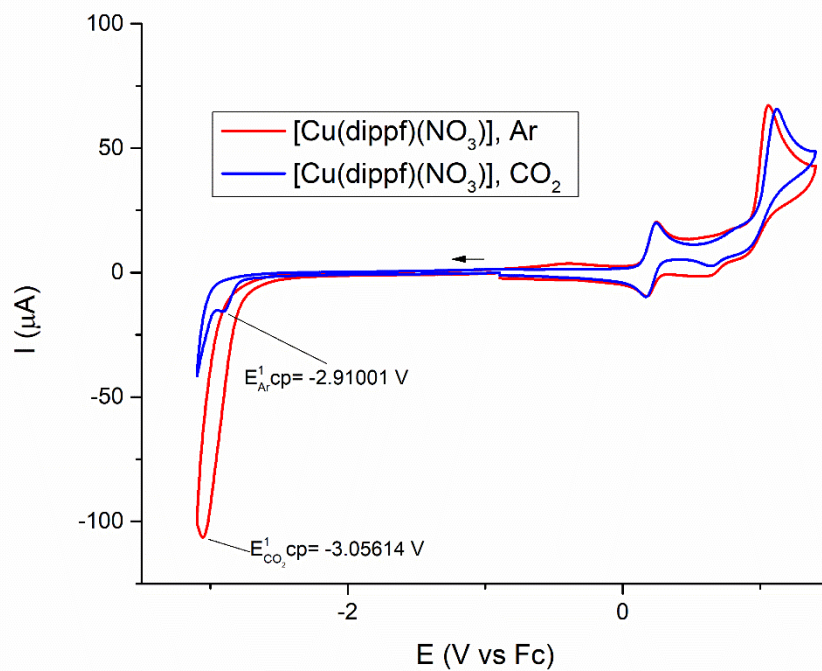

Figure S61. Compound (5) under Ar and CO<sub>2</sub> atmosphere.

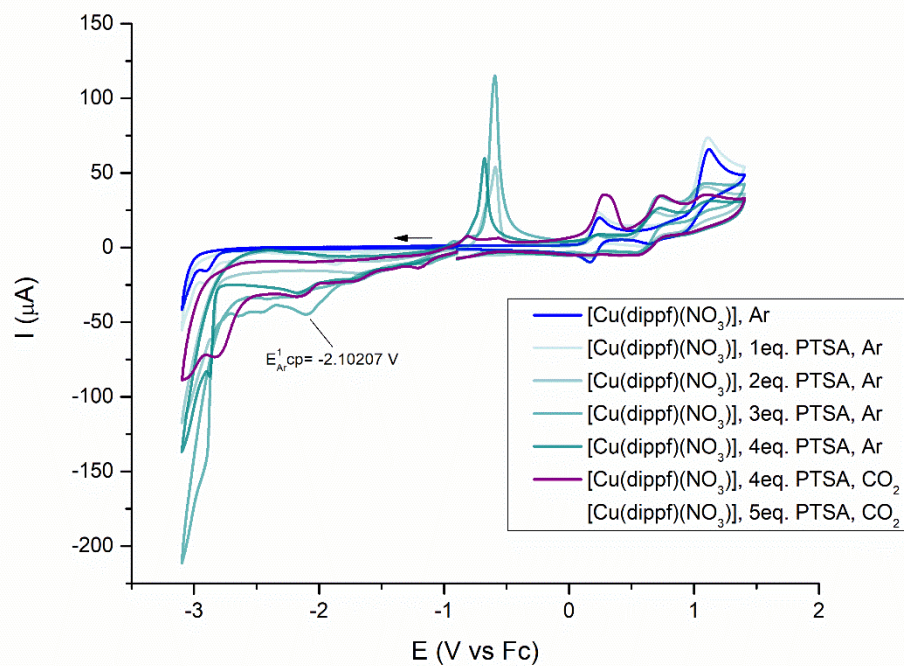

Figure S62. Compound (5) behavior with variable PTSA equivalents under Ar and CO<sub>2</sub> atmosphere.

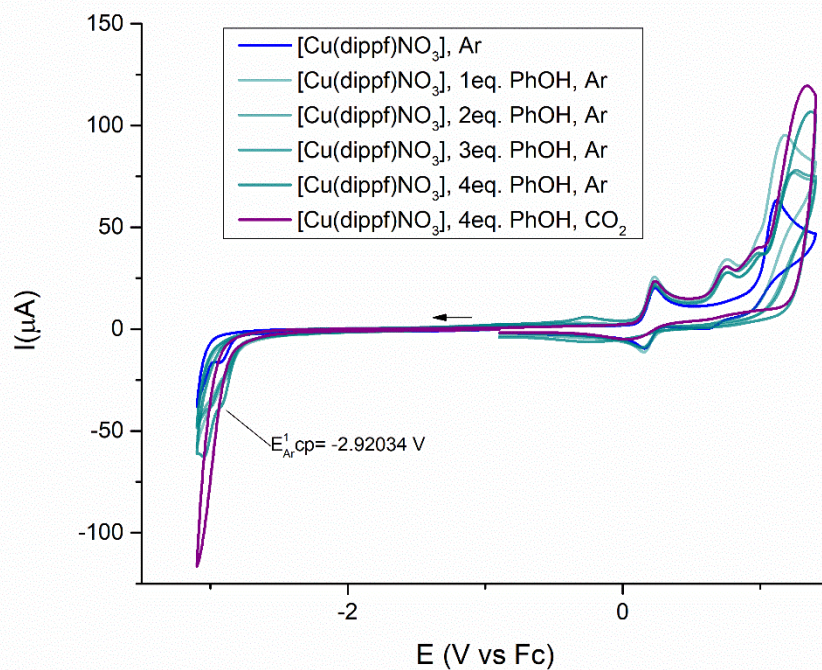

Figure S63. Compound (5) behavior with variable phenol equivalents under Ar and CO<sub>2</sub> atmosphere.

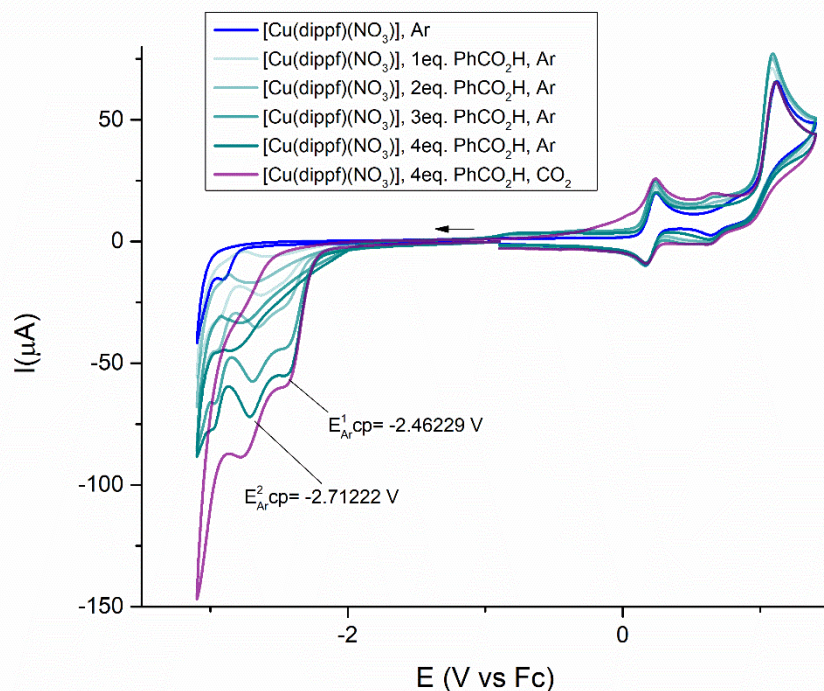

Figure S64. Compound (**5**) behavior with variable benzoic acid equivalents under Ar and CO<sub>2</sub> atmosphere.

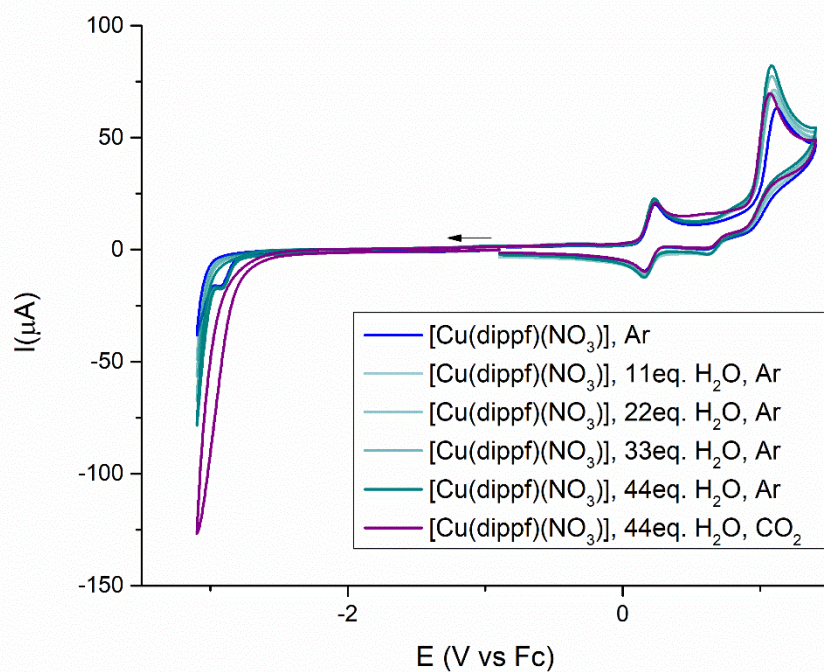

Figure S65. Compound (**5**) behavior with variable water equivalents under Ar and CO<sub>2</sub> atmosphere.

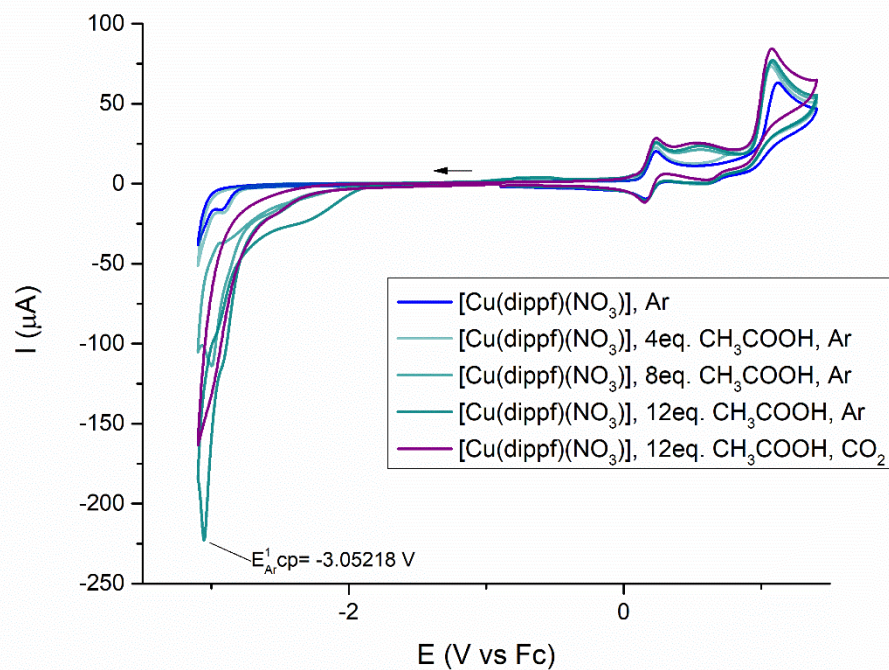

Figure S66. Compound (5) behavior with variable acetic acid equivalents under Ar and CO<sub>2</sub> atmosphere.

Unidad de Servicios de Apoyo a la Investigación y a la Industria (USAI)  
 Facultad de Química, UNAM, Edificio H "Mario Molina"  
 Email: viclemus@unam.mx  
 Phone: 56.22.38.99 Ext. 84040

|                       |                                         |
|-----------------------|-----------------------------------------|
| <b>Date of report</b> | 22-May-23 7:05:48PM                     |
| <b>User ID</b>        | Realizo: M en I. Victor Hugo Lemus Neri |
| <b>Comments</b>       | Muestra: AA507CPCW                      |

| Run         | Weight                   | Carbon | Hydrogen | Nitrogen | Created on           |
|-------------|--------------------------|--------|----------|----------|----------------------|
| 4423055320B | 1.655                    | 67.81% | 5.21%    | 1.38%    | 22-May-23 4:49:12 PM |
| 4423055320A | 1.341                    | 67.75% | 5.26%    | 1.56%    | 22-May-23 4:44:08 PM |
|             | Weight                   | Carbon | Hydrogen | Nitrogen |                      |
|             | Average 1.498            | 67.780 | 5.235    | 1.470    |                      |
|             | Variance 0.049           | 0.002  | 0.001    | 0.016    |                      |
|             | Standard Deviation 0.222 | 0.042  | 0.035    | 0.127    |                      |

Figure S67. Elemental Analysis for  $[\text{Rh}(\text{PPh}_3)_3\text{Cl}(\text{NO})]$ .

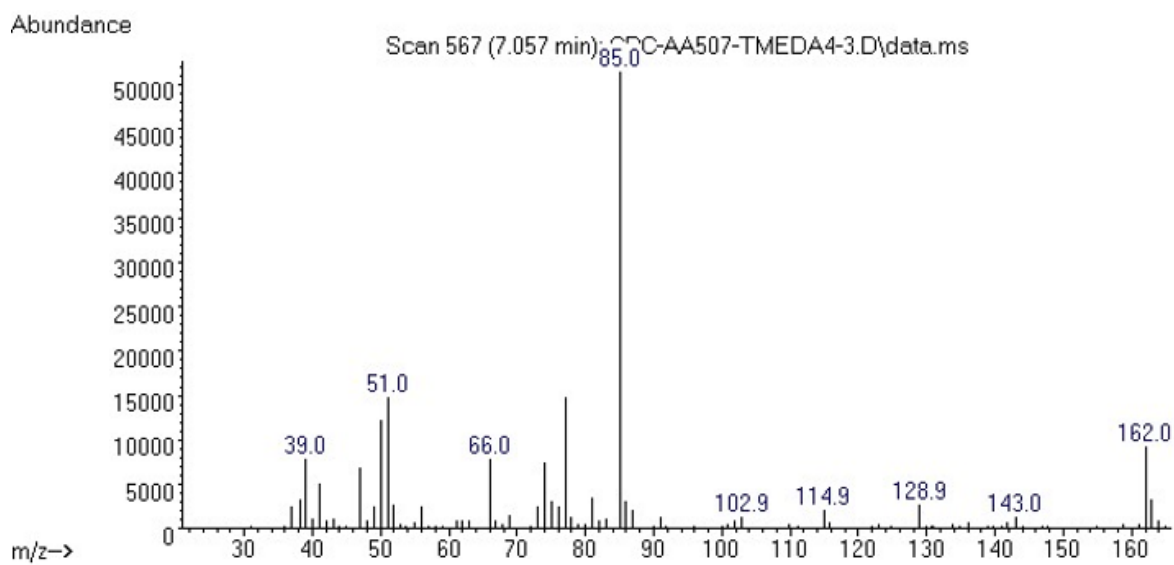

Figure S68. MS spectra of hydrolyzed product (d).  
(m/z)= 162, 115 (2H, CO<sub>2</sub>), 85 (-HNMe).
